# Supplementary material for: Defining the sediment prokaryotic communities of the Indian River Lagoon, FL, USA, an Estuary of National Significance
Source: PubMed Central journal article supplement (PMC7588086; doi:10.1371/journal.pone.0236305), 2020-10-26

# PLOS ONE

## Defining the sediment microbiome of the Indian River Lagoon, FL, USA, an Estuary of National Significance --Manuscript Draft--

|                                                                                                                                                                                                                                                                                                                             |                                                                                                                                                                                                                                                                                                                                                                                                                                                                                                                                                                                                                                                                                                                                                                                                                                                                                                                                                                                                                                                                                                                                                                                                                                                                                                                                                                                                                                                                                                                                                                                                                                                                                                                                                                                                                             |
|-----------------------------------------------------------------------------------------------------------------------------------------------------------------------------------------------------------------------------------------------------------------------------------------------------------------------------|-----------------------------------------------------------------------------------------------------------------------------------------------------------------------------------------------------------------------------------------------------------------------------------------------------------------------------------------------------------------------------------------------------------------------------------------------------------------------------------------------------------------------------------------------------------------------------------------------------------------------------------------------------------------------------------------------------------------------------------------------------------------------------------------------------------------------------------------------------------------------------------------------------------------------------------------------------------------------------------------------------------------------------------------------------------------------------------------------------------------------------------------------------------------------------------------------------------------------------------------------------------------------------------------------------------------------------------------------------------------------------------------------------------------------------------------------------------------------------------------------------------------------------------------------------------------------------------------------------------------------------------------------------------------------------------------------------------------------------------------------------------------------------------------------------------------------------|
| <b>Manuscript Number:</b>                                                                                                                                                                                                                                                                                                   | PONE-D-20-20716                                                                                                                                                                                                                                                                                                                                                                                                                                                                                                                                                                                                                                                                                                                                                                                                                                                                                                                                                                                                                                                                                                                                                                                                                                                                                                                                                                                                                                                                                                                                                                                                                                                                                                                                                                                                             |
| <b>Article Type:</b>                                                                                                                                                                                                                                                                                                        | Research Article                                                                                                                                                                                                                                                                                                                                                                                                                                                                                                                                                                                                                                                                                                                                                                                                                                                                                                                                                                                                                                                                                                                                                                                                                                                                                                                                                                                                                                                                                                                                                                                                                                                                                                                                                                                                            |
| <b>Full Title:</b>                                                                                                                                                                                                                                                                                                          | Defining the sediment microbiome of the Indian River Lagoon, FL, USA, an Estuary of National Significance                                                                                                                                                                                                                                                                                                                                                                                                                                                                                                                                                                                                                                                                                                                                                                                                                                                                                                                                                                                                                                                                                                                                                                                                                                                                                                                                                                                                                                                                                                                                                                                                                                                                                                                   |
| <b>Short Title:</b>                                                                                                                                                                                                                                                                                                         | Sediment Microbiome of the Indian River Lagoon                                                                                                                                                                                                                                                                                                                                                                                                                                                                                                                                                                                                                                                                                                                                                                                                                                                                                                                                                                                                                                                                                                                                                                                                                                                                                                                                                                                                                                                                                                                                                                                                                                                                                                                                                                              |
| <b>Corresponding Author:</b>                                                                                                                                                                                                                                                                                                | David John Bradshaw<br>Florida Atlantic University<br>Fort Pierce, FL UNITED STATES                                                                                                                                                                                                                                                                                                                                                                                                                                                                                                                                                                                                                                                                                                                                                                                                                                                                                                                                                                                                                                                                                                                                                                                                                                                                                                                                                                                                                                                                                                                                                                                                                                                                                                                                         |
| <b>Keywords:</b>                                                                                                                                                                                                                                                                                                            | estuarine sediment microbiome; anoxic sediment; total organic matter; copper; freshwater discharges                                                                                                                                                                                                                                                                                                                                                                                                                                                                                                                                                                                                                                                                                                                                                                                                                                                                                                                                                                                                                                                                                                                                                                                                                                                                                                                                                                                                                                                                                                                                                                                                                                                                                                                         |
| <b>Abstract:</b>                                                                                                                                                                                                                                                                                                            | The Indian River Lagoon, located on the east coast of Florida, USA, is an Estuary of National Significance and an important economic and ecological resource. The Indian River Lagoon faces several environmental pressures, including freshwater discharges through the St. Lucie Estuary; accumulation of a anoxic, fine-grained, organic-rich sediment; and metal contamination from agriculture and marinas. Although the Indian River Lagoon has been well-studied, little is known about its microbial communities; thus, a two-year 16S amplicon sequencing study was conducted to assess the spatiotemporal changes of the sediment microbiome. In general, the Indian River Lagoon exhibited a microbiome that was consistent with other estuarine studies. Statistically different microbiomes were found between the Indian River Lagoon and St. Lucie Estuary due to changes in porewater salinity causing microbes that require salts for growth to be higher in the Indian River Lagoon. The St. Lucie Estuary exhibited more obvious microbial seasonality, such as higher Betaproteobacteriales, a freshwater associated organism, in wet season and higher Flavobacteriales in dry season samples. Distance-based linear models revealed these microbiomes were more affected by changes in total organic matter and copper than changes in temperature. Anaerobic organisms, such as Campylobacteriales, were more associated with high total organic matter and copper samples while aerobic organisms, such as Nitrosopumilales, were more associated with low total organic matter and copper samples. This initial study fills the knowledge gap on the Indian River Lagoon microbiome and serves as an important baseline for possible future changes due to human impacts or environmental changes. |
| <b>Order of Authors:</b>                                                                                                                                                                                                                                                                                                    | David John Bradshaw, Ph.D.<br>Nicholas J. Dickens<br>John H. Trefry<br>Peter J. McCarthy                                                                                                                                                                                                                                                                                                                                                                                                                                                                                                                                                                                                                                                                                                                                                                                                                                                                                                                                                                                                                                                                                                                                                                                                                                                                                                                                                                                                                                                                                                                                                                                                                                                                                                                                    |
| <b>Additional Information:</b>                                                                                                                                                                                                                                                                                              |                                                                                                                                                                                                                                                                                                                                                                                                                                                                                                                                                                                                                                                                                                                                                                                                                                                                                                                                                                                                                                                                                                                                                                                                                                                                                                                                                                                                                                                                                                                                                                                                                                                                                                                                                                                                                             |
| <b>Question</b>                                                                                                                                                                                                                                                                                                             | <b>Response</b>                                                                                                                                                                                                                                                                                                                                                                                                                                                                                                                                                                                                                                                                                                                                                                                                                                                                                                                                                                                                                                                                                                                                                                                                                                                                                                                                                                                                                                                                                                                                                                                                                                                                                                                                                                                                             |
| <b>Financial Disclosure</b><br><br>Enter a financial disclosure statement that describes the sources of funding for the work included in this submission. Review the <a href="#">submission guidelines</a> for detailed requirements. View published research articles from <a href="#">PLOS ONE</a> for specific examples. | This research was supported by the following organizations and agencies: the Harbor Branch Oceanographic Institute Foundation ( <a href="https://hboifoundation.org/">https://hboifoundation.org/</a> ) (DJB), the Everglades Foundation ( <a href="https://evergladesfoundation.org/">https://evergladesfoundation.org/</a> ) (DJB), and the Save Our Seas License Plate ( <a href="https://myfloridaspecialtyplate.com/save-our-seas.html">https://myfloridaspecialtyplate.com/save-our-seas.html</a> ) (PJM). The funders had no role in study design, data collection and analysis, decision to publish, or preparation of the manuscript.                                                                                                                                                                                                                                                                                                                                                                                                                                                                                                                                                                                                                                                                                                                                                                                                                                                                                                                                                                                                                                                                                                                                                                              |

This statement is required for submission and **will appear in the published article** if the submission is accepted. Please make sure it is accurate.

#### Unfunded studies

Enter: *The author(s) received no specific funding for this work.*

#### Funded studies

Enter a statement with the following details:

- Initials of the authors who received each award
- Grant numbers awarded to each author
- The full name of each funder
- URL of each funder website
- Did the sponsors or funders play any role in the study design, data collection and analysis, decision to publish, or preparation of the manuscript?
- **NO** - Include this sentence at the end of your statement: *The funders had no role in study design, data collection and analysis, decision to publish, or preparation of the manuscript.*
- **YES** - Specify the role(s) played.

\* typeset

#### Competing Interests

Use the instructions below to enter a competing interest statement for this submission. On behalf of all authors, disclose any [competing interests](#) that could be perceived to bias this work—acknowledging all financial support and any other relevant financial or non-financial competing interests.

This statement **will appear in the published article** if the submission is accepted. Please make sure it is accurate. View published research articles from [PLOS ONE](#) for specific examples.

The authors have declared that no competing interests exist.

**NO authors have competing interests**

Enter: *The authors have declared that no competing interests exist.*

**Authors with competing interests**

Enter competing interest details beginning with this statement:

*I have read the journal's policy and the authors of this manuscript have the following competing interests: [insert competing interests here]*

\* typeset

**Ethics Statement**

N/A

Enter an ethics statement for this submission. This statement is required if the study involved:

- Human participants
- Human specimens or tissue
- Vertebrate animals or cephalopods
- Vertebrate embryos or tissues
- Field research

Write "N/A" if the submission does not require an ethics statement.

General guidance is provided below. Consult the [submission guidelines](#) for detailed instructions. **Make sure that all information entered here is included in the Methods section of the manuscript.**

**Format for specific study types**

**Human Subject Research (involving human participants and/or tissue)**

- Give the name of the institutional review board or ethics committee that approved the study
- Include the approval number and/or a statement indicating approval of this research
- Indicate the form of consent obtained (written/oral) or the reason that consent was not obtained (e.g. the data were analyzed anonymously)

**Animal Research (involving vertebrate animals, embryos or tissues)**

- Provide the name of the Institutional Animal Care and Use Committee (IACUC) or other relevant ethics board that reviewed the study protocol, and indicate whether they approved this research or granted a formal waiver of ethical approval
- Include an approval number if one was obtained
- If the study involved *non-human primates*, add *additional details* about animal welfare and steps taken to ameliorate suffering
- If anesthesia, euthanasia, or any kind of animal sacrifice is part of the study, include briefly which substances and/or methods were applied

**Field Research**

Include the following details if this study involves the collection of plant, animal, or other materials from a natural setting:

- Field permit number
- Name of the institution or relevant body that granted permission

**Data Availability**

Authors are required to make all data underlying the findings described fully available, without restriction, and from the time of publication. PLOS allows rare exceptions to address legal and ethical concerns. See the [PLOS Data Policy](#) and [FAQ](#) for detailed information.

Yes - all data are fully available without restriction

A Data Availability Statement describing where the data can be found is required at submission. Your answers to this question constitute the Data Availability Statement and **will be published in the article**, if accepted.

**Important:** Stating 'data available on request from the author' is not sufficient. If your data are only available upon request, select 'No' for the first question and explain your exceptional situation in the text box.

Do the authors confirm that all data underlying the findings described in their manuscript are fully available without restriction?

**Describe where the data may be found in full sentences. If you are copying our sample text, replace any instances of XXX with the appropriate details.**

- If the data are **held or will be held in a public repository**, include URLs, accession numbers or DOIs. If this information will only be available after acceptance, indicate this by ticking the box below. For example: *All XXX files are available from the XXX database (accession number(s) XXX, XXX).*
- If the data are all contained **within the manuscript and/or Supporting Information files**, enter the following: *All relevant data are within the manuscript and its Supporting Information files.*
- If neither of these applies but you are able to provide **details of access elsewhere**, with or without limitations, please do so. For example:

*Data cannot be shared publicly because of [XXX]. Data are available from the XXX Institutional Data Access / Ethics Committee (contact via XXX) for researchers who meet the criteria for access to confidential data.*

*The data underlying the results presented in the study are available from (include the name of the third party*

Raw sequences have been uploaded into the National Center for Biotechnology Information Sequence Read Archive (PRJNA594146) (<https://dataview.ncbi.nlm.nih.gov/object/PRJNA594146?reviewer=j30a930a8h6kh633mp24p9c42p>). The Snakemake file used for QIIME2 analysis and any subsequent scripts used in statistical analysis can be found on Github ([https://github.com/djbradshaw2/General\\_16S\\_Amplicon\\_Sequencing\\_Analysis](https://github.com/djbradshaw2/General_16S_Amplicon_Sequencing_Analysis)).

|                                                                                                                                                                                                                                         |                                                                                                                                                                                  |
|-----------------------------------------------------------------------------------------------------------------------------------------------------------------------------------------------------------------------------------------|----------------------------------------------------------------------------------------------------------------------------------------------------------------------------------|
| <p><i>and contact information or URL).</i></p> <ul style="list-style-type: none"><li>• This text is appropriate if the data are owned by a third party and authors do not have permission to share the data.</li></ul> <p>* typeset</p> |                                                                                                                                                                                  |
| Additional data availability information:                                                                                                                                                                                               | Tick here if the URLs/accession numbers/DOIs will be available only after acceptance of the manuscript for publication so that we can ensure their inclusion before publication. |

1 Defining the sediment **microbiome** of the Indian River Lagoon, FL, USA, an Estuary of National  
2 Significance

3

4 David J. Bradshaw II,<sup>1\*</sup> Nicholas J. Dickens,<sup>1#a</sup> John H. Trefry,<sup>2</sup> Peter J. McCarthy<sup>1</sup>

5

6 <sup>1</sup>Department of Biological Sciences, Harbor Branch Oceanographic Institute at Florida Atlantic  
7 University, Fort Pierce, FL, United States of America

8 <sup>2</sup>Department of Ocean Engineering and Marine Sciences, Florida Institute of Technology,  
9 Melbourne, FL, United States of America

10 <sup>#a</sup>Current address: Amazon.com, Inc., London, United Kingdom

11

12 \*Corresponding author

13 E-mail: [dbradshaw2015@fau.edu](mailto:dbradshaw2015@fau.edu) (DJB)

14

15 **Abstract**

16           The Indian River Lagoon, located on the east coast of Florida, USA, is an Estuary of  
17 National Significance and an important economic and ecological resource. The Indian River  
18 Lagoon faces several environmental pressures, including freshwater discharges through the St.  
19 Lucie Estuary; accumulation of a anoxic, fine-grained, organic-rich sediment; and metal  
20 contamination from agriculture and marinas. Although the Indian River Lagoon has been well-  
21 studied, little is known about its microbial communities; thus, a two-year 16S amplicon  
22 sequencing study was conducted to assess the spatiotemporal changes of the sediment  
23 microbiome. In general, the Indian River Lagoon exhibited a microbiome that was consistent  
24 with other estuarine studies. Statistically different microbiomes were found between the Indian  
25 River Lagoon and St. Lucie Estuary due to changes in porewater salinity causing microbes that  
26 require salts for growth to be higher in the Indian River Lagoon. The St. Lucie Estuary exhibited  
27 more obvious microbial seasonality, such as higher Betaproteobacteriales, a freshwater  
28 associated organism, in wet season and higher Flavobacteriales in dry season samples. Distance-  
29 based linear models revealed these microbiomes were more affected by changes in total organic  
30 matter and copper than changes in temperature. Anaerobic organisms, such as  
31 Campylobacterales, were more associated with high total organic matter and copper samples  
32 while aerobic organisms, such as Nitrosopumilales, were more associated with low total organic  
33 matter and copper samples. This initial study fills the knowledge gap on the Indian River Lagoon  
34 microbiome and serves as an important baseline for possible future changes due to human  
35 impacts or environmental changes.

36



## 37 **Introduction**

38           The Indian River Lagoon (IRL) is an Estuary of National Significance located on  
39 Florida's east coast (USA) [1]. The lagoon has a total estimated annual economic value of \$7.6  
40 billion [2]. It is connected, at its southern end, to the St. Lucie Estuary (SLE), another important  
41 resource for the area [3]. The IRL has a high biodiversity because it is located at the border  
42 between temperate and sub-tropical regions, allowing it to have plant and animal species from  
43 both climates [4]. The IRL faces similar environmental issues to other estuaries, including  
44 freshwater inputs, eutrophication, organic matter, and metal contamination [1,5].

45           Freshwater is introduced into the IRL via runoff from local waterways and discharges  
46 from Lake Okeechobee, which are diverted into the SLE through the C-44 canal during periodic  
47 releases based upon the Lake's water level [3]. This introduction of freshwater and its associated  
48 contaminants causes problems for the ecosystem [3] and also introduces dissolved organic  
49 material and plant matter that settles into the sediment to become the fine grained, highly organic  
50 sediment known as "IRL muck" [6]. "IRL muck" (hereinafter referred to as muck) is defined as  
51 sediment that has at least 75% water content, and the remaining solids fraction has at least 60%  
52 fines and 10% total organic matter (TOM) [7]. Muck can lead to various negative ecological  
53 impacts including nutrient flux in the water column triggering algal blooms and turbidity which  
54 damages seagrasses by blocking sunlight [8]. About 10% of the IRL is covered in muck ranging  
55 in depths from centimeters to several meters [1,7,9]. Anoxia is associated with muck and can  
56 also be caused by freshwater discharges carrying contaminants from agriculture and urban  
57 development [7,10,11]. A shift to an anoxic state alters the most energetically favorable terminal  
58 electron acceptors for microbes, altering their population, diversity, and functions [10,11]. A  
59 study of Chesapeake Bay (MD, USA), compared the microbiomes of anoxic, organic-rich, silty-

60 clay sediments to organic-poor, sandy sediments and found major differences due to the former  
61 having microbial members that contribute to the high sulfide and methanogenic conditions in the  
62 area [12].

63 Other pressures on the IRL include contaminants such as trace metals which can be  
64 transported in discharges and runoff as part of metal-dissolved organic matter complexes that  
65 precipitate onto the sediment once this freshwater meets the brackish water of the IRL [6,7,13].  
66 A survey of the northern IRL found several sites with metals above normal levels, while a survey  
67 in the SLE found a large accumulation of phosphorus and Cu, the latter likely due to Cu-  
68 containing fungicides or cuprous oxide anti-fouling paints used in marinas [14–17]. The  
69 interaction of microbes with heavy metals affects their chemical forms and therefore their  
70 solubility, mobility, bioavailability, and toxicity [18]. In turn, prokaryotic assemblages can be  
71 altered by the presence of heavy metals, which can lead to a decrease in microbial diversity and  
72 functional redundancy [5,19–22]. A recent study in Chile, found that there was a significant  
73 decrease in the abundance of bacteria in copper contaminated sites, while the abundance of  
74 archaea was similar to a less contaminated site, likely due to copper resistance mechanisms [23].

75 The true extent of the IRL’s biodiversity cannot be understood without information on its  
76 microbial communities [24]. Sediment microbes, especially in estuaries, face a wide range of  
77 physicochemical gradients that can cause shifts in the microbial taxonomy as well as microbial  
78 functional capabilities [13,25,26]. This study was carried out to provide the first data on the  
79 microbial communities present in the IRL and to explore potential diversity changes due to  
80 differences between: the IRL and SLE; samples with zero muck characteristics (0MC) and three  
81 muck characteristics (muck or 3MC); and non-Cu contaminated and Cu-contaminated, high  
82 TOM samples.

83

## 84 **Materials and methods**

### 85 **Site selection**

86 Sites were chosen based upon either being adjacent to continuous water quality monitoring  
87 stations [27,28] or known to be muck [Manatee Pocket (MP) and Harbor Branch Channel (HB)]  
88 or sandy (Jupiter Narrows and Hobe Sound) sites (Fig 1 and S1 Table). During the second year  
89 of sampling, two additional marina sites [Harbortown Marina (HT) and Vero Beach Marina] and  
90 two nearby less impacted sites (Barber Bridge and Round Island) were added. Using information  
91 from NOWData (National Weather Service), the average monthly temperature and average  
92 monthly rain sum from years 1990-2018 was obtained for the Melbourne Area, Fort Pierce Area,  
93 and Stuart 4 E Stations [29]. Streamflow data was taken from DBHYDRO (South Florida Water  
94 Management District) and from the United States Geological Services website [30,31].

95

96 **Fig 1. Sampling area map.** The sampling area with stars indicating the site locations, triangles  
97 the location of the National Weather Service (NWS) [29] monitoring stations in Melbourne  
98 (MB), Fort Pierce (FP), and Stuart (ST), and circles the inflow gauge locations [United States  
99 Geological Service (USGS) [31] in yellow and the South Florida Water Management District  
100 (SFWMD) [30] in red]; the streams or canals associated with these gauges are denoted by blue  
101 lines. In Maps A and B black stars are the North Indian River Lagoon (IRL) sites: Merritt Island  
102 Causeway (MI), Melbourne Causeway (MC) and the Sebastian Inlet (SI). Blue stars (maps A and  
103 C) are the North Central IRL sites: Vero Beach Marina (VM), Barber Bridge (BB), Vero Beach  
104 (VB), and Round Island (RI). Red stars (maps A and C) are the South Central IRL sites: Harbor  
105 Branch Channel (HB), Linkport (LP), Fort Pierce (FP), and Harbortown Marina (HM). Green

106 stars (maps A and D) are the South IRL sites: Jensen Beach (JB), Manatee Pocket (MP), Jupiter  
107 Narrows (JN) and Hobe Sound (HS). Maroon stars (maps A and D) are the St. Lucie Estuary  
108 (SLE) sites: North Fork (NF), South Fork (SF), Middle Estuary (ME), and South Fork 2 (ST).  
109 GPS coordinates for all study sites and environmental monitoring stations are located in S1  
110 Table.

111

## 112 **Sample collection**

113 A total of 204 sediment samples were taken during four sampling periods over a two-year period,  
114 with two sets of samples during the wet (May-Oct) and dry seasons (Nov-Apr). The samples  
115 were taken during the following months: Aug-Sep 2016 (W16), Mar-Apr 2017 (D17), Oct-Nov  
116 2017(W17), and Apr 2018 (D18). Samples were collected with published methods [7,21]. A  
117 Wildco® Ekman stainless steel bottom grab sampler was deployed from a boat to collect  
118 sediment in triplicate. The first replicate's sediment temperature was determined with a  
119 thermometer. The top 2 cm of each replicate was subsampled with an ethanol-sterilized plastic  
120 spoon. Three sub-samples of each replicate were taken to assess the microbial community (A),  
121 dry sediment characteristics (B), and wet sediment characteristics (C). They were sealed and  
122 placed on ice until returned to the lab. Subsamples A and B were collected in sterile 50-mL  
123 Falcon tubes and 75-mL polystyrene snap-cap vials, respectively, and stored at -20° C. The  
124 remnants of the top 2 cm of the sediment were placed in a double-bagged Ziploc freezer bag as  
125 Subsample C and stored at 4° C. When ready for analysis, subsample B was thawed and dried for  
126 48 hours at 60 °C on pre-weighed, acid-washed, glass petri dishes. The differences in pre- vs  
127 post-drying weights were used to determine water content. The dried sediment was broken up  
128 with an acid-washed mortar and pestle and sieved to remove the fraction above 2 mm (coarse)

129 from the sample. The remaining sand (2 mm-0.063 mm) and fines (<0.063 mm) fractions were  
130 kept for further analysis. All collection plasticware was soaked in 5% HNO<sub>3</sub> for a minimum of  
131 24 hours and then rinsed three times in 18.2 MΩ deionized water.

## 132 **Metal analysis**

133 Triplicate samples at each site were analyzed for heavy metals. Acid digests were prepared by  
134 modification of methods described in three studies [7,32,33]. Briefly, 1 g (+/- 0.0003g) of dried  
135 and sieved Subsample B was digested in 1 M HCl for one hour at 30° C with shaking at 150 rpm.  
136 Digests were filtered with DigiTubes® and DigiFilters® (0.45 μm) (SCP Sciences, Champlain,  
137 NY). Cu and Fe were measured with a four-point calibration curve on a Perkin Elmer 4000  
138 atomic absorption spectrometer (Perkin Elmer, Waltham, MA). The calibration curve was  
139 rechecked every ten to twelve samples to account for absorbance drift. Reagent samples (2%  
140 HNO<sub>3</sub>, 1 M HCl, 18.2 MΩ deionized water) and a method control sample were analyzed to  
141 check for contamination.

## 142 **Sediment physical characteristics**

143 A modified procedure was used to determine sediment characteristics [7]. One gram of dried and  
144 sieved Subsample B sediment was heated in a 550° C muffle furnace for four hours to burn off  
145 the organic matter. The sediment weight loss was calculated and reported as percent TOM. Grain  
146 size was determined by wet sieving 10-30 g of Sample C and drying to constant weight. The  
147 gravel, sand, and fines percentages of the total dry weight were determined. PWS was  
148 determined by centrifuging 20 g of Sample C and measuring the salinity of the resulting liquid  
149 with a portable refractometer.

150

## 151 **Sequence analysis**

152 DNA was extracted from 0.25-0.3 g of sediment with the Qiagen PowerSoil DNA Isolation Kits  
153 (Hilden, Germany), and its quality checked with a Nanodrop 2000 (Oxford Technologies,  
154 Oxford, UK). Samples were sent to Research and Testing (Lubbock, TX, USA) for MiSeq 16S  
155 sequencing to amplify the bacterial/archaeal 16S V4 region with the modified primers used by  
156 the Earth Microbiome Project of 515F (GTGYCAGCMGCCGCGGTAA) and 806R  
157 (GGACTACNVGGGTWTCTAAT) [34,35]. The raw sequences were trimmed to remove the  
158 primers and quality-filtered with the FastX and TrimGalore programs respectively [36,37].  
159 Quantitative Insights Into Microbial Ecology 2's (QIIME2) [38] standard 16S workflow was  
160 used for analysis, and a Snakemake file was used for the orchestration for reproducibility  
161 [39,40]. Sequences were joined with VSEARCH [41]. Next, they were denoised with Deblur  
162 [42] run with default parameters, with the exceptions of the minimum reads parameter set to 0 to  
163 account for metadata categories with smaller sample sizes and trim length set to 232 bases.  
164 Amplicon Sequence Variants (ASVs) were annotated with a Naïve-Bayes classifier based on the  
165 scikit-learn system and the SILVA database [43,44] (version 132). Mitochondrial, chloroplast  
166 and unassigned sequences were filtered from the samples. The ASVs were aligned with MAFFT  
167 [45] and then masked [38,46] to make a phylogenetic tree with FASTTREE [47] that was then  
168 midpoint-rooted. Raw sequences have been uploaded into the National Center for Biotechnology  
169 Information Sequence Read Archive (PRJNA594146) [48].

## 170 **Statistical analysis**

171 RStudio [49,50] (R Version 3.6.1) was used for data manipulation, visualization, generation of  
172 alpha diversity statistics (Shannon), and data manipulation. Analyses were run with the following  
173 library versions: phyloseq (1.28.0) [51], vegan (2.5-5) [52], ggplot2 (2\_3.2.0) [53], reshape

174 (0.8.8) [54], tidyverse (1.2.1) [55], and FSA (0.8.25) [56]. ASVs that did not have at least ten  
175 sequences associated with them across all samples were removed [57,58].

176 PRIMER7/PERMANOVA+ was also used to analyze the data [59–61]. The  
177 environmental data was checked for highly colinear variables, greater than 0.70 [62], by  
178 generating draftsman plots. This showed that TOM was positively colinear with water content,  
179 percent fines, and Fe, and negatively colinear with percent sand. This allowed TOM to represent  
180 all these variables in future analyses. The remaining environmental variables were normalized.  
181 The biological data was square root transformed, then used to make a Bray-Curtis dissimilarity  
182 matrix to create principal coordinates of analyses. Distance-based linear models were made with  
183 a stepwise selection procedure, an AICc (An Information Criterion) selection criteria, 9 999  
184 permutations, marginal tests, and a distance-based redundancy analysis plot [21]. Overall and  
185 pair-wise permutational analysis of variance were conducted with 9 999 permutations, the  
186 unrestricted method, Type III Sum of Squares, and Monte Carlo p-values [5,63]. Overall  
187 statistical significance of environmental data and alpha diversity metrics were determined with  
188 Kruskal-Wallis or Mann Whitney U tests for categories with greater than two or just two  
189 subcategories, respectively [64,65]. Pairwise testing was conducted with the Dunn method [66].  
190 All reported p-values were considered statistically significant if less than 0.05 after multiple  
191 testing correction with the Benjamini-Hochberg (BH) method [67]. The Snakemake file used for  
192 QIIME2 analysis and any subsequent scripts used in statistical analysis can be found on Github  
193 ([https://github.com/djbradshaw2/General\\_16S\\_Amplicon\\_Sequencing\\_Analysis](https://github.com/djbradshaw2/General_16S_Amplicon_Sequencing_Analysis)) [68]. Measured  
194 environmental data and metadata can be found in S2 and S3 Tables, respectively.

195

196

## 197 **Results**

### 198 **Weather and streamflow discharges**

199 Measured air temperatures were higher during each of the sampling periods than historical  
200 temperatures (1990-2018), with W16 being the hottest, followed by W17, D18, and D17 (S1  
201 Fig). Every sampling period besides D17, which was drier than usual, was wetter than usual  
202 especially W17, for which rainfall more than doubled. Streamflow discharges matched this data  
203 with the highest streamflow occurring during W17, especially at the C44 canal leading to the  
204 South Fork 2 site (S4 Table).

### 205 **Porewater salinity and sediment temperature**

206 Porewater salinity (PWS) and sediment temperature were measured to assess changes between  
207 sampling periods (Fig 2). Dunn testing indicated that IRL W16 and W17 sampling periods were  
208 significantly different (BH p-values < 0.05) from each other as well as both the D17 and D18  
209 periods, although these two were significantly similar (BH p-value = 0.16) (Fig 2A and S5  
210 Table). In the SLE, W16 and W17 were significantly similar to one another (0.65) but different  
211 from D17 and D18, which were also statistically similar to one another (0.23). The highest mean  
212 sediment temperature occurred during the W16, and Dunn testing revealed that all sampling  
213 periods were significantly different from one another except for the D17 and W17 temperatures  
214 for both the IRL (0.60) and SLE (0.052).

215

216 **Fig 2. Porewater salinity and sediment temperature patterns.** Porewater salinity (PWS) (left)  
217 and sediment temperature (right) by Estuary by Sampling Period (A) and by Location (B) for the  
218 Indian River Lagoon (IRL) and St. Lucie Estuary (SLE). Bars denote largest and smallest values



219 within 1.5\*the interquartile range, middle line is the median, ends of boxes are the first and third  
220 quartiles. The letters on top of each boxplot denote the results from the pairwise Dunn test with  
221 different letters denoting statistical significance (Benjamini-Hochberg adjusted p values < 0.05).  
222 In A the letters show how each of the sampling periods were different within each estuary but do  
223 not denote inter-estuary comparisons.

224

225 PWS generally increased towards the southern IRL while the SLE had the highest  
226 interquartile range, but the lowest mean (Fig 2B). All sections of the IRL were significantly  
227 different from the SLE, while only the North IRL sites were found to be statistically lower than  
228 the South IRL sites (BH p-value = 0.045) (Fig 2B and S5 Table). Sediment temperature did not  
229 vary greatly across locations, ranging from the highest mean of 26.5 °C (South) to the lowest of  
230 24.4 °C (South Central). Each of the Location subcategories were not statistically different from  
231 one another, except for the South Central IRL being significantly lower than the South  
232 (0.00037).

### 233 **Muck and copper**

234 The sites that, on average, exceeded three muck characteristics were Middle Estuary and South  
235 Fork, while those that exceeded at least one of the thresholds were HB, HT, Melbourne  
236 Causeway, and MP (Fig 3). None of the other 13 sites exceeded the thresholds on average. Out  
237 of the 204 samples, 40 were considered muck since their sediment characteristics exceeded three  
238 thresholds (3MC), 14 only exceeded two thresholds, 10 samples exceeded one, and 140 exceeded  
239 none (0MC) (S3 Table). 3MC samples (water content =81%, TOM = 24%, and silt/clay  
240 percentage = 81%) had 2.4x higher water content, 7.2x higher TOM, and 9.6x higher silt/clay  
241 percentages on average than 0MC samples (3.3%, 34%, 8.4%)

242

243 **Fig 3. Muck characteristics by Site.** Bar graph, with error bars denoting standard error,  
244 summarizing the average muck characteristics associated with each site. Black bars represent  
245 water content. The black dotted line denotes the percentage water content (75% [7]) that a site, if  
246 it exceeded all three thresholds, could be considered muck. Percent silt/clay is represented by the  
247 dark gray bars with the dark gray dotted line representing the 60% [7] threshold. Total organic  
248 matter is represented by the light gray bars with the light gray dotted line representing the 10%  
249 [7] threshold.

250

251 A sample was considered to have high TOM if it exceeded 10% and high Cu if it  
252 exceeded 65  $\mu\text{g/g}$  [7,69]. Most samples that exceed at least one of the muck characteristics also  
253 had high TOM (62/64) (Fig 4 and S3 Table). The sites that had samples with both high TOM and  
254 high Cu (HiHi) included HB, MP, and HT, whereas the sites with samples that had high TOM  
255 but low Cu (HiLo) included Middle Estuary, South Fork, Melbourne Causeway, HT, Linkport,  
256 and South Fork 2. Only two samples, both from HB, were classified as having low TOM and  
257 high Cu (LoHi). The remaining 140 samples had TOM and Cu values below the thresholds  
258 (LoLo). HiHi samples (average Cu = 109  $\mu\text{g/g}$ ) had 3.6x and 23x more Cu than HiLo samples  
259 (30  $\mu\text{g/g}$ ) and LoLo samples (4.7  $\mu\text{g/g}$ ), respectively.

260

261 **Fig 4. Total organic matter by copper.** Point graph showing the relationship between copper  
262 (Cu) concentration ( $\mu\text{g/g}$  sediment) and total organic matter (TOM) percentage. Each of the 204  
263 samples are represented by a point. Color represents the site with dark blue representing Barber  
264 Bridge, bright blue Fort Pierce, red Harbor Branch Channel, purple Harbortown Marina, yellow

265 Hobe Sound, pink Jensen Beach, maroon Jupiter Narrows, dark green Linkport, light blue  
266 Manatee Pocket, gold Melbourne Causeway, tan Merritt Island Causeway, dark gray Middle  
267 Estuary, light blue North Fork, bright green Round Island, light gray Sebastian Inlet, black South  
268 Fork, dark purple South Fork 2, light green Vero Beach, and turquoise Vero Beach Marina.  
269 Shape represents the number of muck characteristics with circles representing three muck  
270 characteristics, triangles two, squares one, and pluses zero. The blue line at 10% [7] represents  
271 the threshold that separates the low TOM (left) from the high TOM (right) sites whereas the red  
272 line at 65 µg/g [69] separates the high Cu (above) from the low Cu (below) sites.

273

## 274 **General sequence information**

275 There were 110 575 ASVs associated with the samples in this study. Filtering, described above,  
276 reduced the number of ASVs to 16 027. This filtering step also reduced the number of sequences  
277 from 1 857 744 to 1 598 653 (13.9%). The overall microbiome had 63 phyla, 193 classes, 472  
278 orders, 799 families, 1 315 genera, and 1 691 species.

## 279 **Alpha diversity**

280 The mean Shannon alpha diversity was 6.45; its distribution was significantly correlated (p-  
281 values <2.2e-16) with observed ASVs (rho = 0.92), Fisher diversity (0.97), Simpson diversity  
282 (0.69), and Chao1 (0.92) with Spearman correlation tests. There were significant differences  
283 between Sites (BH p-value = 0.020), Estuary (0.034), Location (0.0083), Sampling Period (1.1e-  
284 15), IRL-focused Sampling Period (3.76e-15), and SLE-focused Sampling Period (3.7e-07)  
285 categories, but not by TOM/Cu (0.92), Muck (0.78), or Season (0.095) (S6 Table). Dunn analysis  
286 did not reveal any significantly different site pairs. Both the IRL and SLE exhibited the same  
287 patterns in terms of alpha diversity (Fig 5A). The D17 and D18 sampling periods were

288 statistically similar to one another (IRL BH p-value = 0.16, SLE = 0.93); but were statistically  
289 dissimilar to the other two sampling periods, which were also significantly different from each  
290 other. Dunn testing at the Location level revealed that the North sites were statistically lower  
291 than the SLE, South, and South Central sites (Fig 5B).

292

293 **Fig 5. Shannon diversity patterns** Boxplots of Shannon diversity based by Estuary and  
294 Sampling Period (A) and Location (B) categories. IRL stands for Indian River Lagoon and SLE  
295 for St. Lucie Estuary. The letters on top of each boxplot denote the results from the pairwise  
296 Dunn test with different letters denoting statistical significance (Benjamini-Hochberg adjusted p  
297 values < 0.05). In A the letters show how each of the sampling periods were different within  
298 each estuary but do not denote inter-estuary comparisons. Bars denote largest and smallest values  
299 within 1.5 times the interquartile range, middle line is the median, ends of boxes are the first and  
300 third quartiles.

301

### 302 **Microbial community makeup of estuaries**

303 The top three phyla in the IRL and SLE were the same: Proteobacteria, Bacteroidetes, and  
304 Chloroflexi (S2A Fig). The percentage of Epsilonbacteraeota was 16x higher in the IRL (2.2%)  
305 than the SLE (0.14%), whereas the percentage of Nitrospirae in the SLE (3.3%) was 8.7x more  
306 than in the IRL (0.38%). Desulfobacterales, Flavobacteriales, Anaerolineales and  
307 Steroidobacterales were four of the top five orders that overlapped between estuaries. (Fig 6A).  
308 The most common order for the SLE was Betaproteobacteriales (7.9%), which was 18x higher  
309 than the IRL (0.44%). The other top IRL order was Cellvibrionales (4.4%) which was 2.8x  
310 higher than in the SLE (1.5%). The following orders also occurred at levels double or greater in

311 the IRL than in the SLE: *Pirellulales* (2.6x, IRL = 2.4%, SLE = 0.95%), *Campylobacteriales*  
312 (16.0x, 2.2%, 0.14%), *B2M28* (9.6x, 1.9%, 0.20%), *Actinomarinales* (4.0x, 1.7%, 0.43%), and  
313 *Thiotricales* (3.3x, 1.7%, 0.51%). The SLE had more pronounced differences between seasons  
314 than the IRL, which had the same top five orders throughout all sampling periods. (S3 Fig) In the  
315 SLE, *Betaproteobacteriales* was 2.4x higher in the wet seasons (11.1%) than in the dry seasons  
316 (4.6%), whereas *Flavobacteriales* decreased about 4.5x between the dry (6.7%) and wet (1.5%)  
317 seasons. The following also saw decreases of at least 2x: *Actinomarinales* (2.1x, dry = 0.57%,  
318 wet = 0.28%), *Desulfuromonadales* (2.7x, 1.7%, 0.65%) *Verrucomicrobiales* (5.3x, 2.4%,  
319 0.44%), *Rhodobacteriales* (4.5x, 1.7%, 0.38%), *Campylobacteriales* (2.8x, 0.20%, 0.072%).

320

321 **Fig 6. Microbial community patterns.** Stacked bar graphs showing the phylogenetic orders  
322 with a mean prevalence greater than 1% across all samples associated with (A) Indian River  
323 Lagoon (IRL) and St. Lucie Estuary (SLE); (B) three muck characteristics and zero muck  
324 characteristics samples and (C) high total organic matter/high copper (HiHi) and high total  
325 organic matter/low copper (HiLo) samples. TOM stands for total organic matter and Cu stands  
326 for copper.

327

### 328 **Microbial community makeup of 3MC/0MC and HiHi/HiLo** 329 **samples**

330 Samples with three (3MC) and zero muck characteristics (0MC) shared four of their top five  
331 orders including *Desulfobacteriales*, *Anaerolineales*, *Flavobacteriales*, and *Steroidobacteriales* (Fig  
332 6B). *Bacteroidales* and *Cellvibrionales* ~~make~~ up the rest of the top five for 3MC and 0MC  
333 samples respectively. Orders that were found to be at least twice as common in the 3MC samples

334 versus the OMC samples were: Betaproteobacteriales (3.5, 3MC = 4.8%, 0MC = 1.4%),  
335 Campylobacterales (2.3, 1.9%, 0.81%), and Ectothiorhodospirales (2.4, 3.0%, 1.3%). OMC  
336 samples had higher levels of certain orders including Actinomarinales (4.8x, 0.39%, 1.9%),  
337 B2M28 (2.2, 0.80%, 1.8%), Nitrosopumilales (2.7, 0.76%, 2.1%), Pirellulales (5.4, 0.51%,  
338 2.8%), Rhizobiales (2.2, 0.97%, 2.2%), and Synechococcales (2.0, 0.79%, 1.6%).

339         The top phyla for the high TOM and low Cu (HiLo) samples matched the order above for  
340 3MC. High TOM and high Cu (HiHi) samples had the same top three phyla (Proteobacteria,  
341 Bacteroidetes, Chloroflexi) while Epsilonbacteraeota and Crenarchaeota replaced Acidobacteria  
342 and Planctomycetes. (S4A Fig). HiHi and HiLo shared three of the top five orders with the 3MC  
343 and OMC samples: Desulfobacteriales, Flavobacteriales, and Anaerolineales (Fig 6C).

344 Completing the top five for HiHi was Campylobacterales and Bacteroidales; the former was 2.2x  
345 more abundant in HiHi samples (5.2%) than in HiLo samples (2.3%). Betaproteobacteriales and  
346 Steroidobacteriales completed the top five for HiLo, with the former being found 4.0x more in  
347 HiLo samples (5.8%) than in HiHi samples (1.4%). Nitrosopumilales was 2.3x higher in the  
348 HiLo (0.91%) than the HiHi samples (0.40%).

## 349 **Beta diversity**

350 Permutational analysis of variance results showed significant differences between the IRL and  
351 SLE samples, and across samples among the Muck and TOM/Cu subcategories (Monte Carlo p-  
352 values = 0.0001) (Table 1). 3MC and OMC samples were statistically different from one another  
353 (0.0001), and from samples with two and one muck characteristics, which were statistically  
354 similar to one another (0.76). HiHi samples were significantly dissimilar (0.0001) from LoLo  
355 and HiLo samples but not from LoHi samples (0.32). LoLo samples were also not significantly  
356 different than LoHi samples (0.072), but were from HiLo samples (0.0001). All Location

357 combinations were significantly different than one another (0.0001), along with most sampling  
 358 periods (<0.05) except the SLE D17 and D18 sampling periods (0.29) (S7 Table).

359 **Table 1. Summarized permutational analysis of variance results.**

| <b>Overall Parameter Category<sup>a</sup></b>                              | <b>Pseudo-F</b> | P(perms) <sup>c</sup> | P(MC) <sup>d</sup> |
|----------------------------------------------------------------------------|-----------------|-----------------------|--------------------|
| Pair-wise test category <sup>b</sup>                                       | t statistic     |                       |                    |
| <b>Estuary</b>                                                             | <b>42</b>       | <b>0.0001</b>         | <b>0.0001</b>      |
| <b>TOM<sup>e</sup>/Cu<sup>f</sup></b>                                      | <b>7.2</b>      | <b>0.0001</b>         | <b>0.0001</b>      |
| Low TOM/Low Cu, High TOM/High Cu                                           | 2.7             | 0.0001                | 0.0001             |
| Low TOM/Low Cu, Low TOM/High Cu                                            | 1.2             | 0.045                 | 0.072              |
| Low TOM/Low Cu, High TOM/Low Cu                                            | 3.7             | 0.0001                | 0.0001             |
| High TOM/High Cu, Low TOM/High Cu                                          | 1.1             | 0.47                  | 0.32               |
| High TOM/High Cu, High TOM/Low Cu                                          | 2.8             | 0.0001                | 0.0001             |
| Low TOM/High Cu, High TOM/Low Cu                                           | 1.4             | 0.034                 | 0.061              |
| <b>Muck Characteristics</b>                                                | <b>5.4</b>      | <b>0.0001</b>         | <b>0.0001</b>      |
| 0, 2                                                                       | 1.9             | 0.0002                | 0.0001             |
| 0, 3                                                                       | 3.4             | 0.0001                | 0.0001             |
| 0, 1                                                                       | 1.6             | 0.0028                | 0.0022             |
| 2, 3                                                                       | 1.4             | 0.03                  | 0.034              |
| 2, 1                                                                       | 0.82            | 0.88                  | 0.76               |
| 3, 1                                                                       | 1.5             | 0.013                 | 0.017              |
| <b>Estuary by Season</b>                                                   | <b>17</b>       | <b>0.0001</b>         | <b>0.0001</b>      |
| All pairwise analyses had P(MC) values equal to 0.0001 <sup>g</sup>        |                 |                       |                    |
| <b>Location</b>                                                            | <b>10</b>       | <b>0.0001</b>         | <b>0.0001</b>      |
| All pairwise analyses had P(MC) values equal to 0.0001 <sup>g</sup>        |                 |                       |                    |
| <b>Estuary by Sampling Period</b>                                          | <b>10</b>       | <b>0.0001</b>         | <b>0.0001</b>      |
| SLE-D17, SLE-D18                                                           | 1.1             | 0.25                  | 0.29               |
| All other pairwise analyses had P(MC) values less than 0.05 <sup>g</sup>   |                 |                       |                    |
| <b>Site</b>                                                                | <b>11</b>       | <b>0.0001</b>         | <b>0.0001</b>      |
| Barber Bridge, Vero Beach Marina                                           | 1               | 0.31                  | 0.4                |
| All other site pairwise analysis have P(MC) values below 0.05 <sup>g</sup> |                 |                       |                    |

360 <sup>a</sup>Bold text represents results from overall category and <sup>b</sup>regular text represents results from the  
 361 pair-wise testing results.

362 <sup>c</sup>P(perms) stands for the permutation p value, <sup>d</sup>P(MC) stands for Monte Carlo p value, <sup>e</sup>TOM  
 363 stands for total organic matter, and <sup>f</sup>Cu stands for copper. <sup>g</sup>The full results can be seen in S7  
 364 Table.

## 365 **Influence of environmental variables**

366 The environmental variable most statistically associated with microbial variation between the  
367 samples was PWS (Pseudo-F = 20.396, proportion = 0.09171), followed by TOM (15.244,  
368 0.064028), Cu (7.5017, 0.030522), and finally sediment temperature (5.5491, 0.022076) (Fig 7  
369 and S8 Table). PWS generally decreased from the upper left corner to lower right, separating the  
370 IRL sites from the SLE sites. TOM generally decreased from the lower left corner to the upper  
371 right, separating the samples with muck characteristics from those with none. Cu generally  
372 decreased from the top of the graph, where the HiHi and LoHi samples were found, to the  
373 bottom, where the HiLo and LoLo samples were.

374

375 **Fig 7. Distance-based redundancy analysis.** Distance-based redundancy analysis of the  
376 sediment samples with colors representing the amount of copper [high or > 65µg/g [69] (black),  
377 low or < 65µg/g (gray)]. The shape shows the number of muck characteristics associated with a  
378 sample with circles representing 1-3 characteristics and triangles representing no muck  
379 characteristics. A filled shape is an Indian River Lagoon sample and a hollow shape represents a  
380 St. Lucie Estuary sample. The results of the distance-based linear models are shown by the lines  
381 and their associated environmental parameter and shown in S8 Table.

382

## 383 **Discussion**

### 384 **Environmental parameters and seasonality**

385 Sampling was scheduled to capture seasonality, but the extended impacts of Hurricane Irma  
386 which made landfall in Florida, USA on September 10, 2017 shifted one of the sampling periods



387 from Aug-Sept 2017 to Oct-Nov 2017. PWS seasonality was more defined in the SLE than the  
388 IRL since there was a statistically lower PWS in the SLE during both wet seasons compared with  
389 the dry seasons (Fig 2A). This reflects the increased rainfall and consequent discharges from  
390 Lake Okeechobee/C44 and other canals/streams during these times (S1 Fig and S4 Table). In  
391 contrast, the PWS in the IRL was statistically different between the wet seasons (Fig 2A).  
392 Although the sediment temperature was highest during W16, W17 was either statistically similar  
393 to or lower than the two dry seasons in both the IRL and SLE (Fig 2A). In conclusion,  
394 seasonality was a prominent environmental factor in the SLE in terms of PWS but not sediment  
395 temperature; however, neither parameter showed distinguishable seasonality in the IRL. PWS  
396 generally increased from North to South in the IRL, possibly due a greater number of oceanic  
397 inlets in the south (Figs 1 and 2B) [4,70]. Owing to higher freshwater releases, the SLE had a  
398 statistically lower PWS with a wide range (Fig 2B and S4 Table) [70].

### 399 **Muck accumulation**

400 Muck is formed by the bacterial degradation of organic matter at the transition between  
401 freshwater and estuarine waters [6,7]. The sites that had at least one muck sample were located  
402 near this transition in either the SLE (South Fork, Middle Estuary) or C25 (HT) (Figs 1 and 3).  
403 Samples with at least one muck characteristic were also near areas that allowed accumulation of  
404 organic matter due to restricted flow caused by the shape and bathymetry of the area (HB, MP)  
405 or high residence time (MC) (Figs 1 and 3) [71,72]. Although South Fork 2 is located adjacent to  
406 the C44 canal, it experiences periodic large volumes of high velocity flow that could prevent fine  
407 particles and organic matter from settling (Fig 1).

408

409

## 410 **Copper contamination**

411 Copper can be found in the sediment near marinas due to the use of copper-antifouling paints,  
412 which explains why HB, located in a channel historically used for large boats, HT, located by a  
413 large active marina, and MP, located by a small active marina, were the only sites to have high  
414 Cu (Figs 1 and 4) [69,73]. The site by the active Vero Beach Marina is not located in a flow-  
415 restricted area, possibly allowing the current to move contaminants away from the area (Fig 1).

## 416 **Alpha diversity patterns**

417 Alpha diversity was highest in the warmest period (W16) and increased from north to south,  
418 matching the pattern of higher diversity in warmer environments seen in other studies (Figs 5A  
419 and 5B) [74]. The diversity drop associated with W17 samples may be related to the impact of  
420 Hurricane Irma (Fig 5A) [75].

## 421 **Estuarine microbial community differences**

422 PWS has been identified as an important factor in microbiome variation in other studies [63].  
423 The most common phylum associated with either estuary was Proteobacteria, which is consistent  
424 with other estuarine studies (S2A Fig) [12,63,75,76]. Proteobacteria has members that are  
425 capable of utilizing a wide variety of substrates, which allow them to occupy many different  
426 environments [77]. The most common Proteobacteria orders in the IRL and SLE included  
427 Desulfobacterales and Steroidobacterales, while the IRL had more Cellvibrionales, and the SLE  
428 had more Betaproteobacterales (Fig 6A). Most members of Desulfobacterales, including its  
429 high-percentage families Desulfobacteraceae and Desulfobulbaceae (S2C Fig), are sulfate-  
430 reducing bacteria and have also been found in high percentages in other estuary studies [63,78].  
431 The family Woeseiaceae (order Steroidobacterales) (S2C Fig) has members capable of

432 facultative sulfur- and hydrogen-based chemolithoautotrophy and is considered a core member  
433 of marine sediments [79,80]. The family Halieaceae (order Cellvibrionales) (S2C Fig) is found in  
434 coastal marine areas and is capable of aerobic photoheterotrophic growth [81]. *Halioglobus* (S2D  
435 Fig) (Halieaceae) is capable of denitrification and requires NaCl for growth, which may be why  
436 it was more prevalent in the IRL [82]. Betaproteobacteriales was shown in multiple studies to  
437 increase in freshwater-influenced areas of estuarine lagoons, which is similar to this study where  
438 Betaproteobacteriales increased in the SLE during the wet season samples (Fig 6A and S3 Fig)  
439 [63,76]. Flavobacteriales (phylum Bacteroidetes) (Fig 6A) is also commonly abundant in other  
440 estuary studies [75]. Most members of the family Flavobacteriaceae (S2C Fig) require NaCl or  
441 seawater salts for growth, which explains the decrease in Flavobacteriales during the wet seasons  
442 in the SLE (S3 Fig) [83]. Anaerolineaceae (phylum Chloroflexi, order Anaerolineales) (Fig 6A  
443 and S2A Fig) is comprised of obligate anaerobes with most members capable of breaking down  
444 proteinaceous carbon sources [84]. Behera et al. (2017), in another study into the effects of  
445 freshwater on a brackish lagoon, found that the phylum Acidobacteria and classes  
446 Gammaproteobacteria and Alphaproteobacteria were higher in more marine environments [63].  
447 Our study instead found that there were more Acidobacteria in the more freshwater SLE along  
448 with relatively equal amounts of Gamma- (0.61% more in IRL) and Alphaproteobacteria (0.13%  
449 more in SLE) (S2A and S2B Figs).

450       Microbes that are highly abundant in a system are likely to be the actively-metabolizing  
451 part of the community; although a portion of the rare microbes can be active, they are more  
452 likely to be dormant or dead cells [85,86]. Since Desulfobacterales and Steroidobacterales had  
453 high relative abundances, they were likely responsible for some of the sulfur cycling in the  
454 lagoon [78,80]. Likewise, carbon cycling was likely affected by the photosynthetic

455 Cellvibrionales and members of Anaerolineales [82,84]. Nitrogen cycling also was affected by  
456 denitrifying members of Cellvibrionales, like Halioglobus and nitrogen-fixing members of  
457 Betaproteobacteriales [78,81].

## 458 **Microbiome shifts associated with copper and muck**

459 Alpha diversity did not decrease in stressed sediments (sediment with muck characteristics or  
460 Cu-contamination) as seen in other studies exploring the effects of metals and clay/silt [5,19].  
461 While a diversity decrease can be an indicator of impaired environmental health, organisms can  
462 also become adapted to stressors with the largest drop in diversity associated with initial  
463 exposure to contamination [5]. Thus, it is possible the community has had enough time to adapt  
464 to contamination and for tolerant species to flourish [87]. There were significant differences  
465 between the 0MC and 3MC microbiomes, which could be partially due to the smaller pore size  
466 in muck affecting the ability of some microbes to flourish [88].

467 TOM has also been seen as an important environmental variable in other studies [89] or  
468 studies that measured TOM-covarying parameters such as percent fines [5] or silt [21]. The top  
469 phyla matched between the 0MC and IRL samples as well as the 3MC and SLE samples (S2A  
470 and S4A Figs). This pattern likely occurred because 43.8% (21/48) of the samples in the SLE  
471 were classified as 3MC samples whereas only 12.2% (19/156) of the IRL sites were classified as  
472 3MC samples. This could help explain why there were higher percentages of  
473 Betaproteobacteriales in the 3MC samples as well as the HiLo samples since there were also no  
474 HiHi samples in the SLE samples.

475 In comparison to HiLo samples and 0MC samples, HiHi and 3MC samples had higher  
476 percentages of Epsilonbacteraeota and Crenarchaeota (S4A and S5A Figs). A recent study  
477 suggested that Archaea, such as the Crenarchaeota, have a greater resistance to copper

478 contamination due to their ability to sequester or pump out copper; this study also found  
479 Crenarchaeota flourishing in their copper-contaminated samples [23]. Members of the order  
480 Campylobacterales (phylum Epsilonbacteraeota) were also found at higher abundances in HiHi  
481 and 3MC sediments; some of its members, including the genus *Sulfurovum*, have been found in  
482 sulfide- and hydrocarbon-rich sediments similar to muck [90] as well as metal-contaminated  
483 sediments [91,92]. (Figs 6B and 6A; S4D and S5D Figs). *Sulfurovum* is a mesophilic facultative  
484 anaerobe, requires salts for chemolithoautotrophic growth with elemental sulfur or thiosulfate as  
485 an electron donor, nitrate or oxygen as an electron acceptor, and CO<sub>2</sub> as its carbon source [93].  
486 Conversely, 0MC and HiLo samples had higher abundances of the *Candidatus Nitrosopumilus*  
487 genus and its associated higher taxonomic ranks *Nitrosopumilus* is similar to *Sulfurovum* in that  
488 it uses CO<sub>2</sub> as its carbon source and is halophilic, but it grows chemolithoautotrophically by  
489 conducting ammonia oxidation to nitrite and is aerobic. Other families which are typically  
490 aerobic and were more abundant in the 0MC samples included Pirellulaceae and  
491 Sandaracinaceae [94–96]. This shows that the microbiome differences between 3MC and 0MC  
492 samples were at least partially due to the former being typically more anaerobic since increased  
493 organic matter can lead to increased respiration and depletion of oxygen [7]. 3MC samples also  
494 had lower abundances of Cyanobiaceae which could be due to the increased turbidity associated  
495 with muck and its higher percentage of silt/clay [7]. Sediment microbial communities have been  
496 shown in other studies to be greatly affected by carbon sources, electron acceptors, and amount  
497 of oxygen in an area [12,89].

## 498 **Conclusions**

499 The most important variable causing shifts between the microbiomes was PWS, this was mainly  
500 due to the influence of seasonal freshwater discharges into SLE causing microbiome differences

501 in comparison to the IRL. Other observed differences included increases in anaerobic organisms  
502 in the higher TOM 3MC samples and aerobic organisms in the lower TOM 0MC samples.  
503 Tracking changes in the differentially abundant microbes present in different sediment types will  
504 allow management agencies to predict areas that are at risk of developing muck due to microbial  
505 influences or becoming sufficiently copper-contaminated to cause biological harm. This study  
506 provides the first NGS data on the microbial diversity of the IRL which will serve as an  
507 important baseline for future studies to measure the impact of anthropogenic inputs and natural  
508 disasters. This data can also be used by researchers in other estuarine areas to compare their  
509 results to determine if their systems are facing similar shifts in the microbiomes due to similar  
510 anthropogenic impacts.

511         Future studies should be performed with greater sequencing depth and higher sampling  
512 frequency, which could allow more of the diversity and rarer taxa in the samples to be captured,  
513 and shotgun metagenomics to identify functional differences between sites. Incorporating the  
514 measurement of anoxia and biogeochemical cycles would help to further delineate which  
515 environmental variables are causing shifts to the microbiomes between sediment types and  
516 geographical locations.

## 517 **Acknowledgements**

518 We thank Dennis Hanisak and Joshua Voss for their guidance throughout this project; Gabrielle  
519 Barbarite, Austin Fox, Stacey Fox, Dedra Harmody, John Hart, Hunter Hines, Brandon  
520 McHenry, and Carlie Perricone for their advice and contributions to the research. A special  
521 thanks to Emily Sniegowski for her support and thoughtful edits.

## 522 **References**

- 523 1. Indian River Lagoon National Estuary Program [IRLNEP]. Indian River Lagoon  
524 Comprehensive Conservation and Management Plan. 2019.
- 525 2. East Central Florida Regional Planning Council [ECFRPC], Treasure Coast Regional  
526 Planning Council [TCRPC]. Indian River Lagoon Economic Valuation Update [Internet].  
527 2016. Available from:  
528 [http://tcrpc.org/special\\_projects/IRL\\_Econ\\_Valu/FinalReportIRL08\\_26\\_2016.pdf](http://tcrpc.org/special_projects/IRL_Econ_Valu/FinalReportIRL08_26_2016.pdf)
- 529 3. McKeon CS, Tunberg BG, Johnston CA, Barshis DJ. Ecological drivers and habitat  
530 associations of estuarine bivalves. PeerJ [Internet]. 2015;3:e1348. Available from:  
531 <https://peerj.com/articles/1348>
- 532 4. Indian River Lagoon National Estuary Program [IRLNEP], St. Johns Water Management  
533 District [SJRWMD]. Indian River Lagoon: An Introduction to a National Treasure. 2007.
- 534 5. Sun MY, Dafforn KA, Brown M V., Johnston EL. Bacterial communities are sensitive  
535 indicators of contaminant stress. Mar Pollut Bull. 2012;64(5):1029–38.
- 536 6. Yang Y, He Z, Wang Y, Fan J, Liang Z, Stoffella PJ. Dissolved organic matter in relation  
537 to nutrients (N and P) and heavy metals in surface runoff water as affected by temporal  
538 variation and land uses—A case study from Indian River Area, south Florida, USA. Agric  
539 water Manag. 2013;118:38–49.
- 540 7. Trefry JH, Windsor JG, Trocine RP. Toxic Substances in the Indian River Lagoon: Results  
541 from the 2006/07 (TOX 2) Survey Contract SJ47613. 2008.
- 542 8. St. Johns River Water Management District [SJRWMD]. The Eau Gallie River and Elbow  
543 Creek Restoration Dredging Project [Internet]. 2019 [cited 2017 May 3]. Available from:  
544 <http://www.sjrwmd.com/EGRET/>

- 545 9. Zhang MK, He ZL, Stoffella PJ, Calvert DV, Yang X, Sime PL. Concentrations and  
546 solubility of heavy metals in muck sediments from the St. Lucie Estuary, U.S.A. *Environ*  
547 *Geol.* 2003;44:1–7.
- 548 10. Crump BC, Adams HE, Hobbie JE, Kling GW. Biogeography of bacterioplankton in lakes  
549 and streams of an arctic tundra catchment. *Ecology.* 2007;88(6):1365–78.
- 550 11. Diaz RJ, Rosenberg R. Spreading dead zones and consequences for marine ecosystems.  
551 *Science* (80-) [Internet]. 2008;321(5891):926–9. Available from:  
552 <http://www.ncbi.nlm.nih.gov/pubmed/18703733>
- 553 12. Johnson JM, Wawrik B, Isom C, Boling WB, Callaghan A V. Interrogation of Chesapeake  
554 Bay sediment microbial communities for intrinsic alkane-utilizing potential under anaerobic  
555 conditions. *FEMS Microbiol Ecol.* 2015;
- 556 13. Nogales B, Lanfranconi MP, Piña-Villalonga JM, Bosch R. Anthropogenic perturbations in  
557 marine microbial communities. Vol. 35, *FEMS Microbiology Reviews.* 2011. p. 275–98.
- 558 14. He ZL, Zhang M, Stoffella PJ, Yang XE. Vertical distribution and water solubility of  
559 phosphorus and heavy metals in sediments of the St. Lucie Estuary, South Florida, USA.  
560 *Environ Geol.* 2006;
- 561 15. Trefry JH, Trocine RP. Metals in sediments and clams from the Indian River Lagoon,  
562 Florida: 2006-7 versus 1992. *Florida Sci.* 2011;74:43–62.
- 563 16. Soule DF, Oguri M, Jones BH. The marine environment of Marina Del Rey: October 1989  
564 to September 1990. *Marine Studies of San Pedro Bay, California, Part 20F.* Los Angeles;  
565 1991.
- 566 17. McMahon PJT. The impact of marinas on water quality. *Water Sci Technol.* 1989;21(2):39–  
567 43.



- 568 18. Gadd GM. Metals, minerals and microbes: Geomicrobiology and bioremediation. Vol. 156,  
569 Microbiology. 2010. p. 609–43.
- 570 19. Magalhães CM, Machado A, Matos P, Bordalo AA. Impact of copper on the diversity,  
571 abundance and transcription of nitrite and nitrous oxide reductase genes in an urban  
572 European estuary. FEMS Microbiol Ecol. 2011;
- 573 20. Cornall A, Rose A, Streten C, Mcguinness K, Parry D, Gibb K. Molecular screening of  
574 microbial communities for candidate indicators of multiple metal impacts in marine  
575 sediments from northern Australia. Environ Toxicol Chem. 2016;35(2):468–84.
- 576 21. Sun MY, Dafforn KA, Johnston EL, Brown M V. Core sediment bacteria drive community  
577 response to anthropogenic contamination over multiple environmental gradients. Environ  
578 Microbiol. 2013;15(9):2517–31.
- 579 22. Vishnivetskaya TA, Mosher JJ, Palumbo A V., Yang ZK, Podar M, Brown SD, et al.  
580 Mercury and other heavy metals influence bacterial community structure in contaminated  
581 Tennessee streams. Appl Environ Microbiol. 2011;77(1):302–11.
- 582 23. Besaury L, Ghiglione JF, Quillet L. Abundance, Activity, and Diversity of Archaeal and  
583 Bacterial Communities in Both Uncontaminated and Highly Copper-Contaminated Marine  
584 Sediments. Mar Biotechnol. 2014;
- 585 24. Garland JL. Potential Extent of Bacterial Biodiversity in the Indian-River Lagoon. Bull Mar  
586 Sci. 1995;57(1):79–83.
- 587 25. Oni OE, Schmidt F, Miyatake T, Kasten S, Witt M, Hinrichs KU, et al. Microbial  
588 communities and organic matter composition in surface and subsurface sediments of the  
589 Helgoland mud area, North Sea. Front Microbiol. 2015;
- 590 26. Hunter EM, Mills HJ, Kostka JE. Microbial community diversity associated with carbon

- 591 and nitrogen cycling in permeable shelf sediments. *Appl Environ Microbiol.* 2006;
- 592 27. St. Johns Water Management District [SJRWMD]. Continuous Sensor-based Water Quality  
593 Data [Internet]. 2020 [cited 2020 Apr 2]. Available from:  
594 <http://webapub.sjrwmd.com/agws10/hdswq/>
- 595 28. Harbor Branch Oceanographic Institute [HBOI]. FAU Harbor Branch Indian River Lagoon  
596 Observator [Internet]. 2020 [cited 2020 Apr 2]. Available from: <http://fau.loboviz.com/>
- 597 29. National Weather Service [NWS]. NOWData - NOAA Online Weather Data (Melbourne,  
598 FL) [Internet]. 2020 [cited 2020 Apr 2]. Available from:  
599 <https://w2.weather.gov/climate/xmacis.php?wfo=mlb>
- 600 30. South Florida Water Management District [SFWMD]. DBHYDRO [Internet]. 2020 [cited  
601 2020 Apr 2]. Available from:  
602 [https://my.sfwmd.gov/dbhydroplsql/show\\_dbkey\\_info.main\\_menu](https://my.sfwmd.gov/dbhydroplsql/show_dbkey_info.main_menu)
- 603 31. United States Geological Service [USGS]. Current Conditions for Florida: Streamflow  
604 [Internet]. 2020 [cited 2020 Apr 2]. Available from:  
605 [https://waterdata.usgs.gov/fl/nwis/current/?type=flow&group\\_key=basin\\_cd](https://waterdata.usgs.gov/fl/nwis/current/?type=flow&group_key=basin_cd)
- 606 32. Munksgaard NC, Parry DL. Trace metals, arsenic and lead isotopes in dissolved and  
607 particulate phases of North Australian coastal and estuarine seawater. *Mar Chem.*  
608 2001;75(3):165–84.
- 609 33. Cornall AM, Beyer S, Rose A, Streten-Joyce C, McGuinness K, Parry D, et al. HCl-  
610 Extractable Metal Profiles Correlate with Bacterial Population Shifts in Metal-Impacted  
611 Anoxic Coastal Sediment from the Wet/Dry Tropics. *Geomicrobiol J* [Internet].  
612 2013;30(1):48–60. Available from:  
613 <http://www.tandfonline.com/doi/abs/10.1080/01490451.2011.653083>

- 614 34. Caporaso JG, Lauber CL, Walters W a, Berg-Lyons D, Huntley J, Fierer N, et al. Ultra-  
615 high-throughput microbial community analysis on the Illumina HiSeq and MiSeq platforms.  
616 ISME J [Internet]. 2012;6(8):1621–4. Available from:  
617 <http://dx.doi.org/10.1038/ismej.2012.8>
- 618 35. Earth Microbiome Project [EMP]. “16S rRNA Amplification Protocol” [Internet]. 2019  
619 [cited 2017 May 3]. Available from: [http://www.earthmicrobiome.org/emp-standard-](http://www.earthmicrobiome.org/emp-standard-protocols/16s/)  
620 [protocols/16s/](http://www.earthmicrobiome.org/emp-standard-protocols/16s/)
- 621 36. Andrews S. FastQC. Babraham Bioinforma. 2010;
- 622 37. Krueger F. Trim Galore [Internet]. Babraham Bioinformatics. 2016. Available from:  
623 <https://github.com/FelixKrueger/TrimGalore>
- 624 38. Bolyen E, Rideout JR, Dillon MR, Bokulich NA, Abnet CC, Al-Ghalith GA, et al.  
625 Reproducible, interactive, scalable and extensible microbiome data science using QIIME 2.  
626 Nature Biotechnology. 2019.
- 627 39. QIIME 2 Development Team. “Moving Pictures” tutorial [Internet]. 2019 [cited 2019 Mar  
628 6]. Available from: <https://docs.qiime2.org/2018.11/tutorials/moving-pictures/>
- 629 40. Köster J, Rahmann S. Snakemake-a scalable bioinformatics workflow engine.  
630 Bioinformatics. 2012;
- 631 41. Rognes T, Flouri T, Nichols B, Quince C, Mahé F. VSEARCH: a versatile open source tool  
632 for metagenomics. PeerJ. 2016;
- 633 42. Amir A, McDonald D, Navas-Molina JA, Kopylova E, Morton JT, Zech Xu Z, et al. Deblur  
634 Rapidly Resolves Single-Nucleotide Community Sequence Patterns. mSystems. 2017;
- 635 43. Klindworth A, Pruesse E, Schweer T, Peplies J, Quast C, Horn M, et al. Evaluation of  
636 general 16S ribosomal RNA gene PCR primers for classical and next-generation

- 637 sequencing-based diversity studies. *Nucleic Acids Res.* 2013;41(1).
- 638 44. Pedregosa F, Varoquaux G, Gramfort A, Michel V, Thirion B, Grisel O, et al. Scikit-learn:  
639 Machine learning in Python. *J Mach Learn Res.* 2011;
- 640 45. Katoh K, Standley DM. MAFFT multiple sequence alignment software version 7:  
641 improvements in performance and usability. *Mol Biol Evol.* 2013;
- 642 46. Lane DJ. *Nucleic Acid Techniques in Bacterial Systematics.* In: Stackebrandt E,  
643 Goodfellow M, editors. New York: John Wiley and Sons; 1991. p. 115–75.
- 644 47. Price MN, Dehal PS, Arkin AP. FastTree 2 - Approximately maximum-likelihood trees for  
645 large alignments. *PLoS One.* 2010;
- 646 48. Bradshaw DJ. BioProject: PRJNA594146 [Internet]. 2020. Available from:  
647 [https://dataview.ncbi.nlm.nih.gov/object/PRJNA594146?reviewer=j30a930a8h6kh633mp](https://dataview.ncbi.nlm.nih.gov/object/PRJNA594146?reviewer=j30a930a8h6kh633mp24p9c42p)  
648 [24p9c42p](https://dataview.ncbi.nlm.nih.gov/object/PRJNA594146?reviewer=j30a930a8h6kh633mp24p9c42p)
- 649 49. RStudio Team. RStudio: Integrated Development for R. [Online] RStudio, Inc., Boston,  
650 MA URL <http://www.rstudio.com>. 2015.
- 651 50. R Development Core Team. Computational Many-Particle Physics. *R Found Stat Comput*  
652 [Internet]. 2008;739. Available from: <http://link.springer.com/10.1007/978-3-540-74686-7>
- 653 51. McMurdie PJ, Holmes S. Phyloseq: An R Package for Reproducible Interactive Analysis  
654 and Graphics of Microbiome Census Data. *PLoS One.* 2013;8(4).
- 655 52. Oksanen J, Blanchet FG, Kindt R, Legendre P, McGlin D, Minchin PR, et al. vegan:  
656 Community Ecology Package [Internet]. 2019. Available from: [https://cran.r-](https://cran.r-project.org/package=vegan)  
657 [project.org/package=vegan](https://cran.r-project.org/package=vegan)
- 658 53. Wickham H. *ggplot2: elegant graphics for data analysis.* *Journal of the Royal Statistical*  
659 *Society: Series A (Statistics in Society).* 2016.

- 660 54. Wickham H. Reshaping data with the reshape package. *J Stat Softw.* 2007;
- 661 55. Wickham H. tidyverse: Easily Install and Load the “Tidyverse.” R package version 1.2.1.  
662 2017.
- 663 56. Ogle D, Wheeler P, Dinno A. FSA: Fisheries Stock Analysis [Internet]. 2019. Available  
664 from: <https://github.com/droglenc/FSA>
- 665 57. Bolyen E, Rideout JR, Dillon MR, Bokulich NA, Abnet C, Ghalith GA Al, et al. QIIME 2:  
666 Reproducible, interactive, scalable, and extensible microbiome data science. *PeerJ Prepr.*  
667 2018;
- 668 58. Ziegler M, Seneca FO, Yum LK, Palumbi SR, Voolstra CR. Bacterial community dynamics  
669 are linked to patterns of coral heat tolerance. *Nat Commun.* 2017;
- 670 59. Anderson MJ, Gorley RN, Clarke KR. PERMANOVA+ for PRIMER: Guide to Software  
671 and Statistical Methods. Plymouth, UK. 2008.
- 672 60. Gutiérrez NL, Hilborn R, Defeo O, Clarke KR, Gorley RN, Barrientos IM, et al. Getting  
673 started with PRIMER v7 Plymouth Routines In Multivariate Ecological Research. *Rev Mex*  
674 *Biodivers.* 2018;
- 675 61. Clarke KR, Gorley RN. 'PRIMER v7: User Manual / Tutorial. 2015.
- 676 62. Ward L, Taylor MW, Power JF, Scott BJ, McDonald IR, Stott MB. Microbial community  
677 dynamics in Inferno Crater Lake, a thermally fluctuating geothermal spring. *ISME J.* 2017;
- 678 63. Behera P, Mahapatra S, Mohapatra M, Kim JY, Adhya TK, Raina V, et al. Salinity and  
679 macrophyte drive the biogeography of the sedimentary bacterial communities in a brackish  
680 water tropical coastal lagoon. *Sci Total Environ.* 2017;
- 681 64. Gooch JW. Kruskal-Wallis Test. In: *Encyclopedic Dictionary of Polymers.* 2011.
- 682 65. Gooch JW. Mann-Whitney U Test. In: *Encyclopedic Dictionary of Polymers.* 2011.

- 683 66. Elliott AC, Hynan LS. A SAS® macro implementation of a multiple comparison post hoc  
684 test for a Kruskal-Wallis analysis. *Comput Methods Programs Biomed.* 2011;
- 685 67. Benjamini Y, Hochberg Y. Controlling the False Discovery Rate: A Practical and Powerful  
686 Approach to Multiple Testing. *J R Stat Soc Ser B.* 1995;
- 687 68. Bradshaw DJ. *General\_16S\_Amplicon\_Sequencing\_Analysis* [Internet]. 2019 [cited 2019  
688 Feb 12]. Available from:  
689 [https://github.com/djbradshaw2/General\\_16S\\_Amplicon\\_Sequencing\\_Analysis](https://github.com/djbradshaw2/General_16S_Amplicon_Sequencing_Analysis)
- 690 69. Australian and New Zealand Environment and Conservation Council [ANZECC].  
691 Australian and New Zealand guidelines for fresh and marine water quality. A. 2000.
- 692 70. Sime P. St. Lucie Estuary and Indian River Lagoon conceptual ecological model. *Wetlands.*  
693 2006;
- 694 71. Trefry JH, Chen N, Trocine RP, Metz S. Impingement of Organic-Rich, Contaminated  
695 Sediments on Manatee Pocket, Florida. *Florida Sci.* 1992;160–71.
- 696 72. Badylak S, Philips EJ. Spatial and temporal patterns of phytoplankton composition in a  
697 subtropical coastal lagoon, the Indian River Lagoon, Florida, USA. *J Plankton Res.* 2004;
- 698 73. United States Environmental Protection Agency [USEPA]. National Management  
699 Measures Guidance to Control Nonpoint Source Pollution from Marinas and Recreational  
700 Boating, EPA 841-B-01-005. 2001.
- 701 74. Dell'Anno A, Beolchini F, Rocchetti L, Luna GM, Danovaro R. High bacterial biodiversity  
702 increases degradation performance of hydrocarbons during bioremediation of contaminated  
703 harbor marine sediments. *Environ Pollut.* 2012;
- 704 75. Mohit V, Archambault P, Lovejoy C. Resilience and adjustments of surface sediment  
705 bacterial communities in an enclosed shallow coastal lagoon, Magdalen Islands, Gulf of St.

- 706 Lawrence, Canada. FEMS Microbiol Ecol. 2015;
- 707 76. Quero GM, Perini L, Pesole G, Manzari C, Lionetti C, Bastianini M, et al. Seasonal rather  
708 than spatial variability drives planktonic and benthic bacterial diversity in a microtidal  
709 lagoon and the adjacent open sea. Mol Ecol. 2017;
- 710 77. Guttman DS, McHardy AC, Schulze-Lefert P. Microbial genome-enabled insights into  
711 plant-microorganism interactions. Nature Reviews Genetics. 2014.
- 712 78. Brenner DJ, Krieg NR, Staley JT, editors. Bergey's Manual of Systematic Bacteriology -  
713 Vol 2: The Proteobacteria Part C -The Alpha-, Beta-, Delta-, and Epsilonproteobacteria. 2nd  
714 ed. New York: Springer Science+Business Media, Inc.; 2005.
- 715 79. Du ZJ, Wang ZJ, Zhao JX, Chen GJ. *Woeseia oceani* gen. nov., sp. nov., a  
716 chemoheterotrophic member of the order Chromatiales, and proposal of *Woeseiaceae* fam.  
717 nov. Int J Syst Evol Microbiol. 2016;
- 718 80. Mußmann M, Pjevac P, Krüger K, Dykma S. Genomic repertoire of the  
719 *Woeseiaceae*/JTB255, cosmopolitan and abundant core members of microbial communities  
720 in marine sediments. ISME J. 2017;
- 721 81. Spring S, Scheuner C, Göker M, Klenk HP. A taxonomic framework for emerging groups  
722 of ecologically important marine gammaproteobacteria based on the reconstruction of  
723 evolutionary relationships using genome-scale data. Front Microbiol. 2015;
- 724 82. Park S, Yoshizawa S, Inomata K, Kogure K, Yokota A. *Halioglobus japonicus* gen. nov.,  
725 sp. nov. and *halioglobus pacificus* sp. nov., members of the class gammaproteobacteria  
726 isolated from seawater. Int J Syst Evol Microbiol. 2012;
- 727 83. Krieg NR, Staley JT, Brown DR, Hedlund BP, Paster BJ, Ward NL, et al., editors. Bergey's  
728 Volume 4 Bacteroidetes, Acidobacteria, Spirochaetes, Tenericutes (Mollicutes),

- 729 Acidobacteria, Fibrobacteres, Fusobacteria, Dictyoglomi, Gemmatimonadetes,  
730 Lentisphaerae, Verrucomicrobia, Chlamydiae, and Planctomycetes. 2nd ed. New; 2011.
- 731 84. McIlroy SJ, Kirkegaard RH, Dueholm MS, Fernando E, Karst SM, Albertsen M, et al.  
732 Culture-independent analyses reveal novel anaerolineaceae as abundant primary fermenters  
733 in anaerobic digesters treating waste activated sludge. *Front Microbiol.* 2017;
- 734 85. Campbell BJ, Yu L, Heidelberg JF, Kirchman DL. Activity of abundant and rare bacteria  
735 in a coastal ocean. *Proc Natl Acad Sci.* 2011;
- 736 86. Gaidos E, Rusch A, Ilardo M. Ribosomal tag pyrosequencing of DNA and RNA from  
737 benthic coral reef microbiota: Community spatial structure, rare members and nitrogen-  
738 cycling guilds. *Environ Microbiol.* 2011;
- 739 87. Gillan DC, Danis B, Pernet P, Joly G, Dubois P. Structure of sediment-associated microbial  
740 communities along a heavy-metal contamination gradient in the marine environment. *Appl*  
741 *Environ Microbiol.* 2005;71(2):679–90.
- 742 88. Oppenheimer CH. Bacterial activity in sediments of shallow marine bays. *Geochim*  
743 *Cosmochim Acta.* 2003;
- 744 89. Mahmoudi N, Robeson MS, Castro HF, Fortney JL, Techtmann SM, Joyner DC, et al.  
745 Microbial community composition and diversity in Caspian Sea sediments. *FEMS*  
746 *Microbiol Ecol.* 2015;91(1).
- 747 90. Waite DW, Vanwonderghem I, Rinke C, Parks DH, Zhang Y, Takai K, et al. Comparative  
748 genomic analysis of the class Epsilonproteobacteria and proposed reclassification to  
749 epsilonbacteraeota (phyl. nov.). *Front Microbiol.* 2017;
- 750 91. Hou D, Zhang P, Zhang J, Zhou Y, Yang Y, Mao Q, et al. Spatial variation of sediment  
751 bacterial community in an acid mine drainage contaminated area and surrounding river



- 752 basin. J Environ Manage. 2019;
- 753 92. Fernández-Cadena JC, Ruíz-Fernández PS, Fernández-Ronquillo TE, Díez B, Trefault N,  
754 Andrade S, et al. Detection of sentinel bacteria in mangrove sediments contaminated with  
755 heavy metals. Mar Pollut Bull. 2020;
- 756 93. Inagaki F, Takai K, Nealson KH, Horikoshi K. Sulfurovum lithotrophicum gen. nov., sp.  
757 nov., a novel sulfur-oxidizing chemolithoautotroph within the E-Proteobacteria isolated  
758 from Okinawa Trough hydrothermal sediments. Int J Syst Evol Microbiol. 2004;
- 759 94. Mohr KI, Garcia RO, Gerth K, Irschik H, Müller R. Sandaracinus amylolyticus gen. nov.,  
760 sp. nov., a starch-degrading soil myxobacterium, and description of Sandaracinaceae fam.  
761 nov. Int J Syst Evol Microbiol. 2012;
- 762 95. Schlesner H, Rensmann C, Tindall BJ, Gade D, Rabus R, Pfeiffer S, et al. Taxonomic  
763 heterogeneity within the Planctomycetales as derived by DNA-DNA hybridization,  
764 description of Rhodopirellula baltica gen. nov., sp. nov., transfer of Perillula marina to the  
765 genus Blastopirellula gen. nov. as Blastopirellula marina comb. nov. an. Int J Syst Evol  
766 Microbiol. 2004;
- 767 96. Bondoso J, Albuquerque L, Nobre MF, Lobo-da-Cunha A, da Costa MS, Lage OM.  
768 Roseimaritima ulvae gen. nov., sp. nov. and Rubripirellula obstinata gen. nov., sp. nov. two  
769 novel planctomycetes isolated from the epiphytic community of macroalgae. Syst Appl  
770 Microbiol. 2015;

771

772

773 **Supporting information**

774 **S1 Fig. National Weather Service temperature and rain sum patterns.** National Weather  
775 Service NOWData showing the four sampling periods (Aug-Sep 2016 (dark orange), Mar-Apr  
776 2017a (dark green), Oct-Nov 2017b (light orange), Apr 2018 (light green)) as well as the historical  
777 temperature (A) and rain sum (B) during those months for the years 1990-2018 (dark gray). Bars  
778 denote standard error.

779 **S2 Fig. Other taxonomic levels by Estuary.** Stacked bar graphs showing the phyla (A), classes  
780 (B), orders (C), families (D), and genera (E) that have a mean of greater than 1% across all samples.  
781 These graphs show the differences between the two main basins of the study, (Indian River Lagoon  
782 (IRL) or St. Lucie Estuary (SLE))

783 **S3 Fig. Estuary orders by Sampling Period.** Stacked bar graph showing the orders with a mean  
784 greater than 1% across all samples grouped by estuary (Indian River Lagoon (IRL) or St. Lucie  
785 Estuary (SLE)) and sampling period (Aug/Sept 2016, Mar/Apr 2017, Oct/Nov 2017, and Apr  
786 2018).

787 **S4 Fig. Other taxonomic levels by Muck classification.** Stacked bar graphs showing the phyla  
788 (A), classes (B), orders (C), families (D), and genera (E) that have a mean of greater than 1%  
789 across all samples. These graphs show the differences between the samples with three and zero  
790 muck characteristics.

791 **S5 Fig. Other taxonomic levels by Total Organic Matter/Copper classification.** Other  
792 taxonomic levels by Total Organic Matter/Copper classification  
793 Stacked bar graphs showing the phyla (A), classes (B), orders (C), families (D), and genera (E)  
794 that have a mean of greater than 1% across all samples. These graphs show the differences between  
795 the samples with high TOM and copper (HiHi) and high TOM and low copper (HiLo).

796 **S1 Table. GPS Coordinates.** <sup>a</sup>NWS stands for National Weather Service [29], <sup>b</sup>IRFWCD for  
797 Indian River Farms Water Control District, <sup>c</sup>USGS for United States Geological Service [31],  
798 <sup>d</sup>SFWMD for South Florida Water Management District [30].

799 **S2 Table. Measured environmental variables per sample.** Sediment temperature was  
800 determined using a thermometer, water content by weight loss during oven drying, total organic  
801 matter by weight loss in a muffle furnace, grain size fractions (gravel, sand, and silt/clay) were  
802 determined using wet sieving, and Cu and Fe were measured using an atomic adsorption  
803 spectrometer. See manuscript for details.

804 **S3 Table. Metadata per sample.** Table containing information pertaining to each sample such as  
805 when (Sampling Season, Season) and where (Site, Location, Estuary) it was taken. A sample was  
806 considered to have a muck characteristic if it exceeded one of the muck thresholds: 10% for total  
807 organic matter, 60% for silt/clay fraction, and 75 % for water content [7]. Additionally, a sample  
808 was considered to have high copper if it exceeded 65 µg/g [69]. <sup>a</sup>IRL for Indian River Lagoon,  
809 <sup>b</sup>SLE for St. Lucie Estuary, <sup>c</sup>TOM stands for total organic matter, <sup>d</sup>Cu for copper, <sup>e</sup>LoLo for low  
810 TOM/low Cu, <sup>f</sup>HiHi for high TOM/low Cu, <sup>g</sup>LoHi for low TOM/low Cu, and <sup>h</sup>HiLo stands for  
811 high TOM/low Cu.

812 **S4 Table. Average monthly means for canal daily discharges (ft<sup>3</sup>/s).** Data was taken from the  
813 \*United States Geological Services online database [31] or the \*\*South Florida Water  
814 Management District's DBHYDRO online database [30]. <sup>a</sup>The regional location each canal/stream  
815 was found in, <sup>b</sup>data from the month before and months during each sampling period and <sup>c</sup>the entire  
816 survey. <sup>d</sup>The the average streamflow from all fourteen stream/canals during the months before and  
817 during each sampling period. IRL stands for Indian River Lagoon.

818 **S5 Table. Environmental parameters statistical analysis.** <sup>a</sup>Bold text is associated with testing  
819 the overall differences within a category with Kruskal-Wallis. <sup>b</sup>Regular text is associated with pair-  
820 wise Dunn testing. <sup>c</sup>BH stands for Benjamini-Hochberg, <sup>d</sup>IRL stands for Indian River Lagoon and  
821 <sup>e</sup>SLE stands for St. Lucie Estuary.

822 **S6 Table. Shannon diversity statistical analysis.** <sup>a</sup>Bold text is associated with testing the overall  
823 differences within a category with Kruskal-Wallis or Mann-Whitney use with a \* indicating the  
824 latter was used. <sup>b</sup>Regular text is associated with pair-wise Dunn testing. <sup>c</sup>BH stands for Benjami-  
825 Hochberg, <sup>d</sup>TOM for total organic matter, <sup>e</sup>Cu for copper, <sup>f</sup>IRL for Indian River Lagoon and <sup>g</sup>SLE  
826 for St. Lucie Estuary.

827 **S7 Table. Full permutational analysis of variance results.** <sup>a</sup>Bold text is associated with testing  
828 the overall differences within a category and <sup>b</sup>regular text is associated with pair-wise testing.  
829 <sup>c</sup>P(perms) stands for permutational p value, P(MC) for Monte-Carlo p value, <sup>e</sup>TOM for total  
830 organic matter, <sup>f</sup>Cu for copper, <sup>g</sup>IRL stands for Indian River Lagoon and <sup>h</sup>SLE for St. Lucie  
831 Estuary.

832 **S8 Table. Distance-based linear model results.** <sup>a</sup>Marginal statistical tests are displayed for all  
833 variables and <sup>b</sup>sequential statistical results are shown only if the variable was determined to  
834 contribute a statistically significant amount of variation between microbial samples (p value <  
835 0.05). <sup>c</sup>SS for sum of squares and <sup>d</sup>AICc stands for An Information Criterion.

836

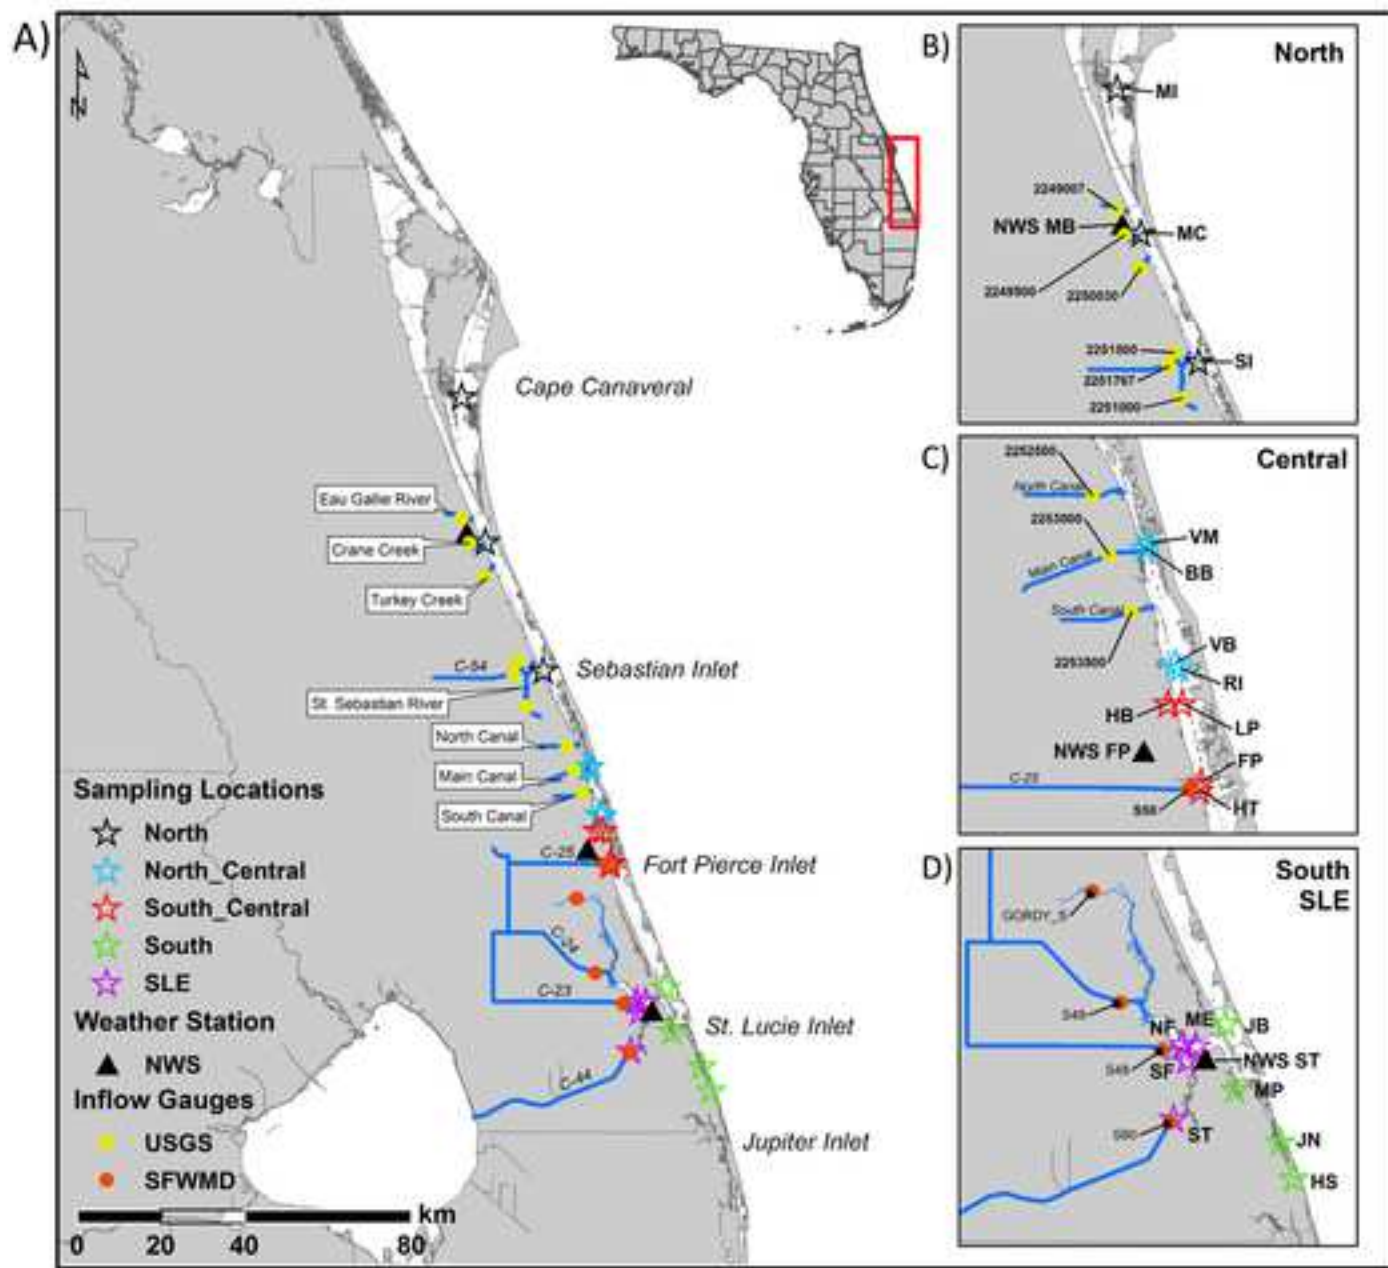

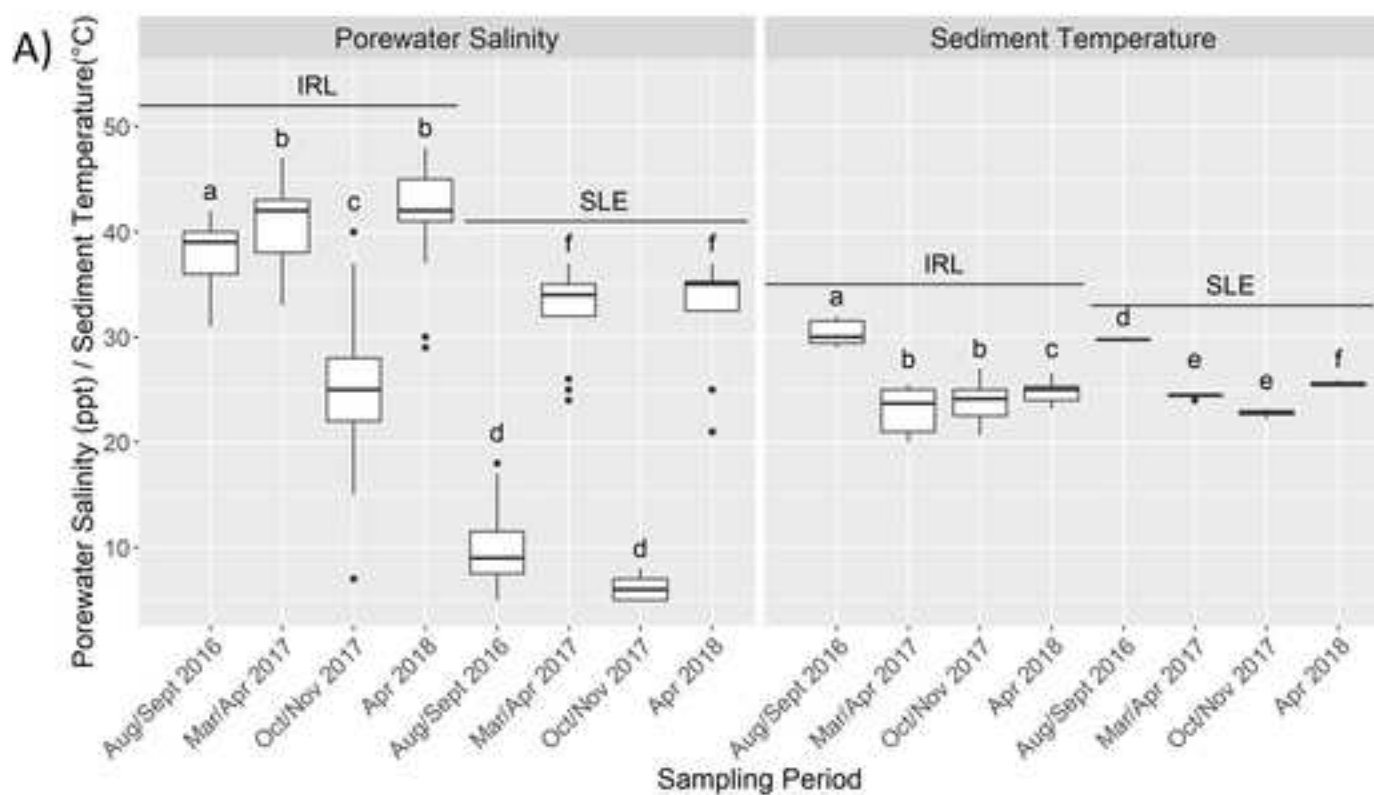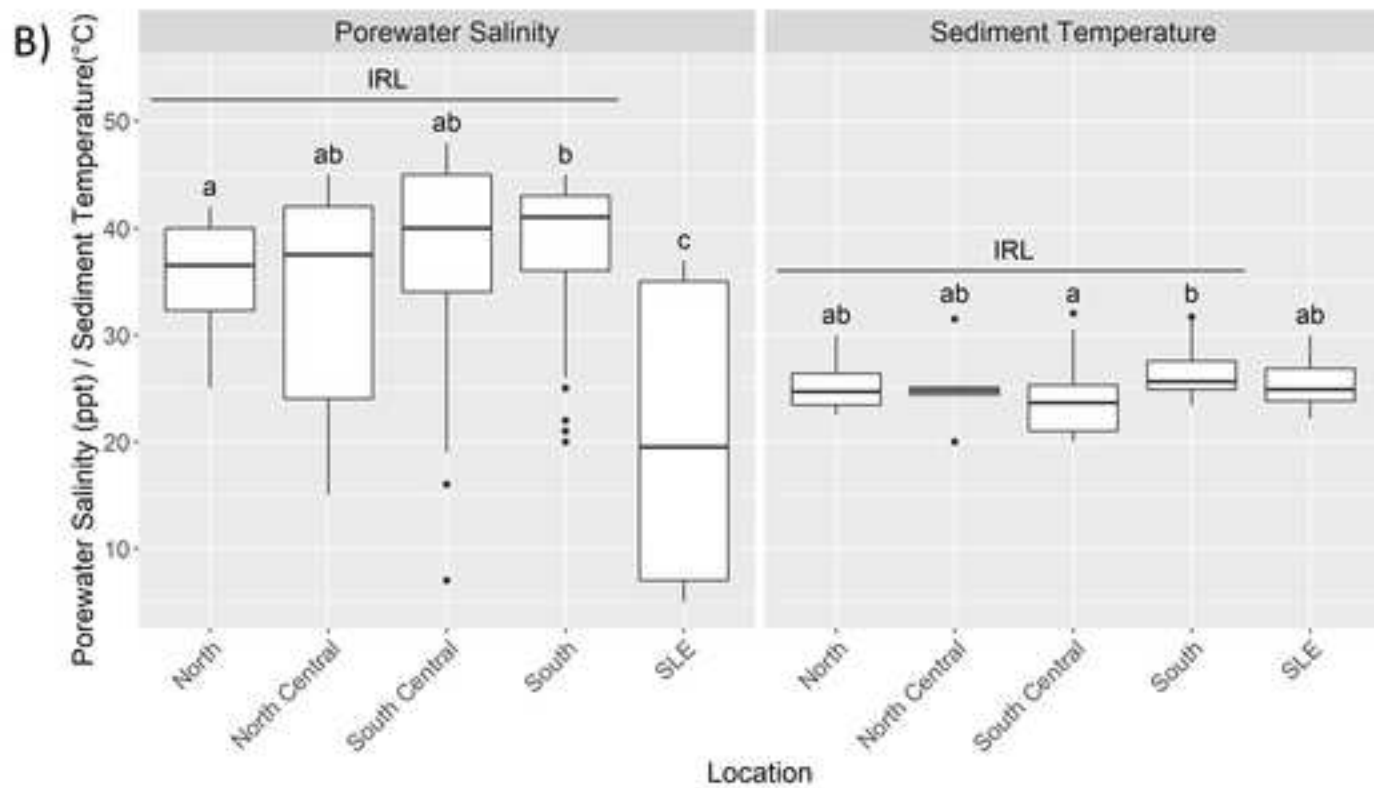

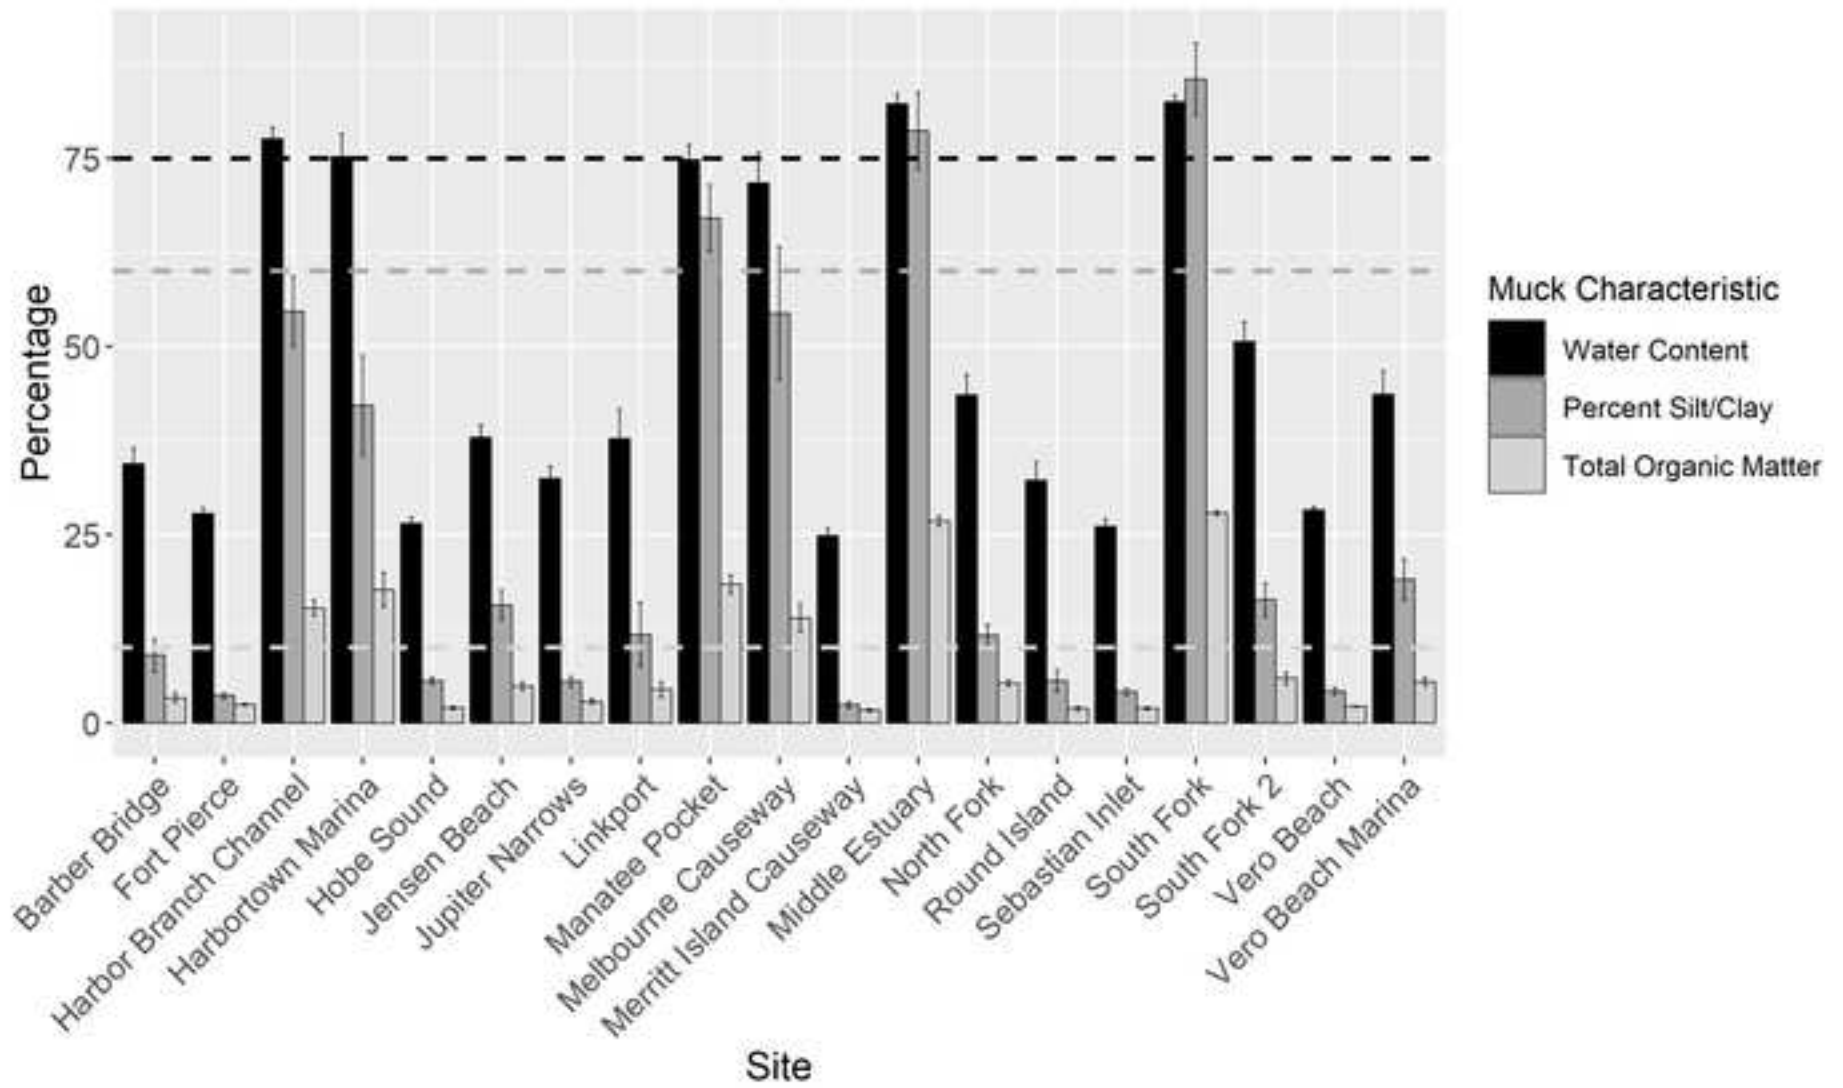

Fig 4

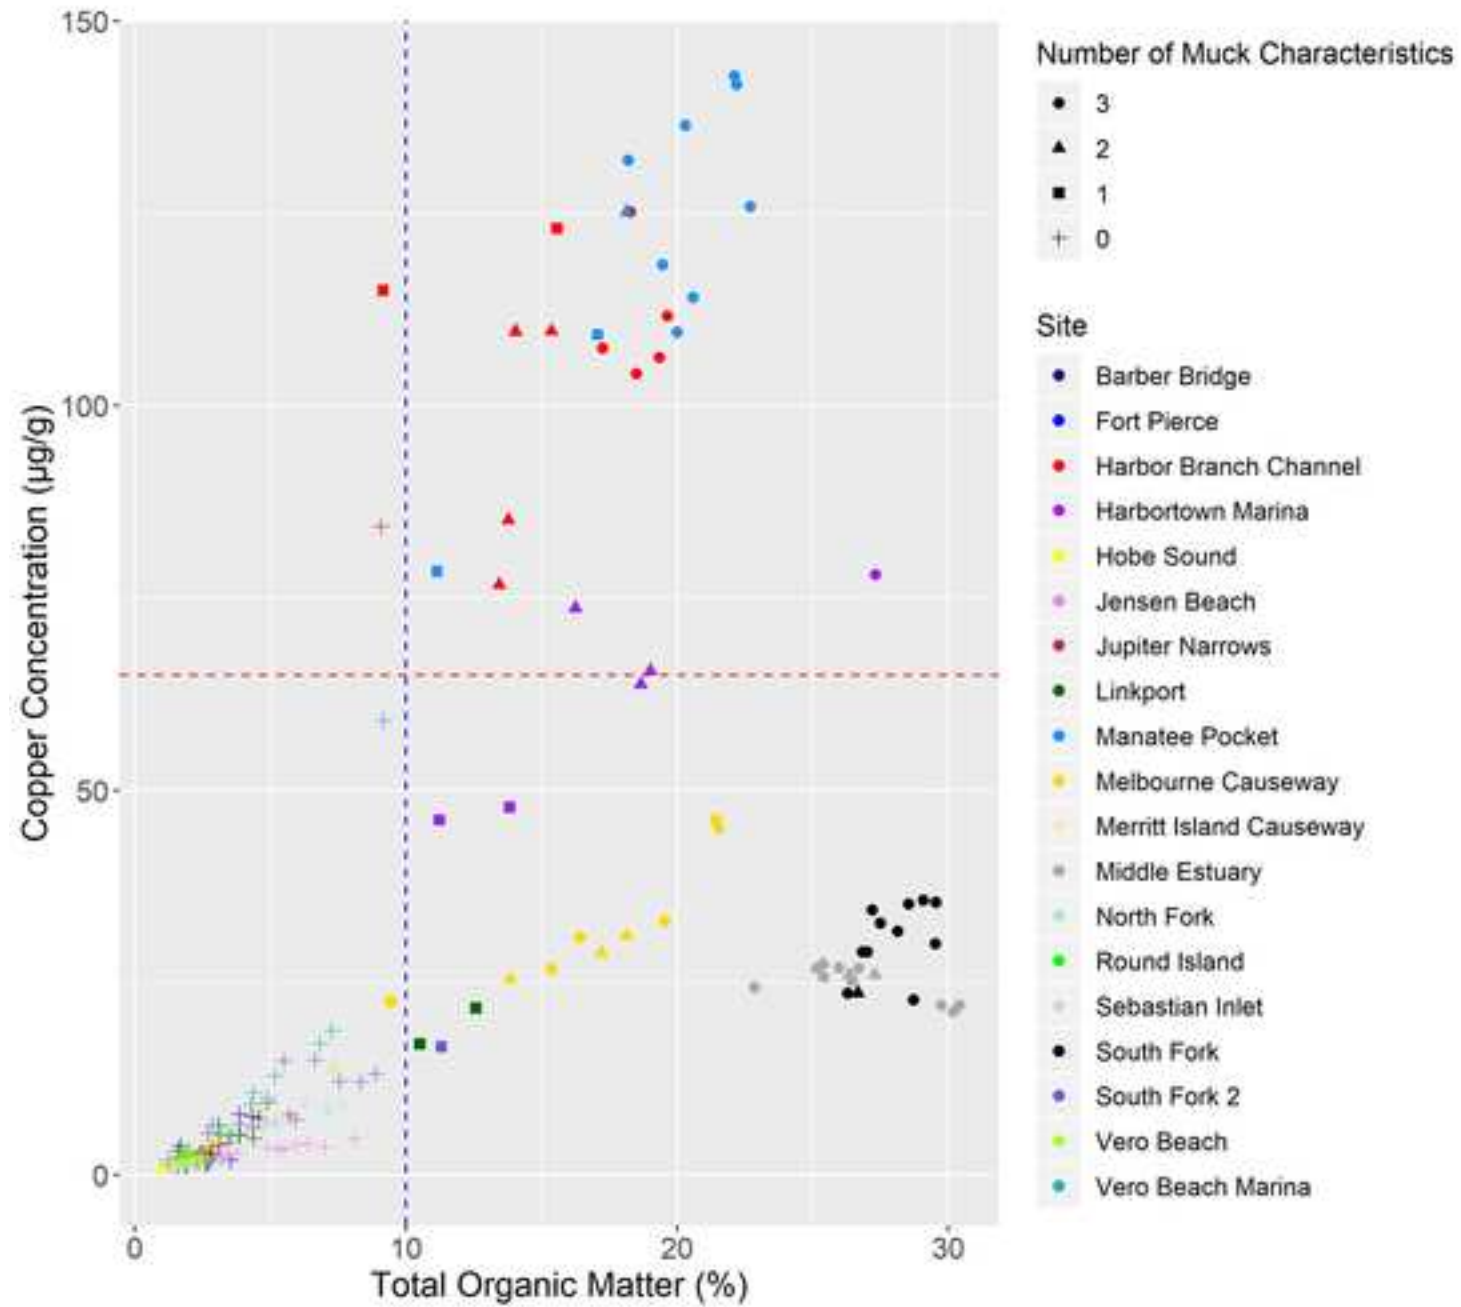



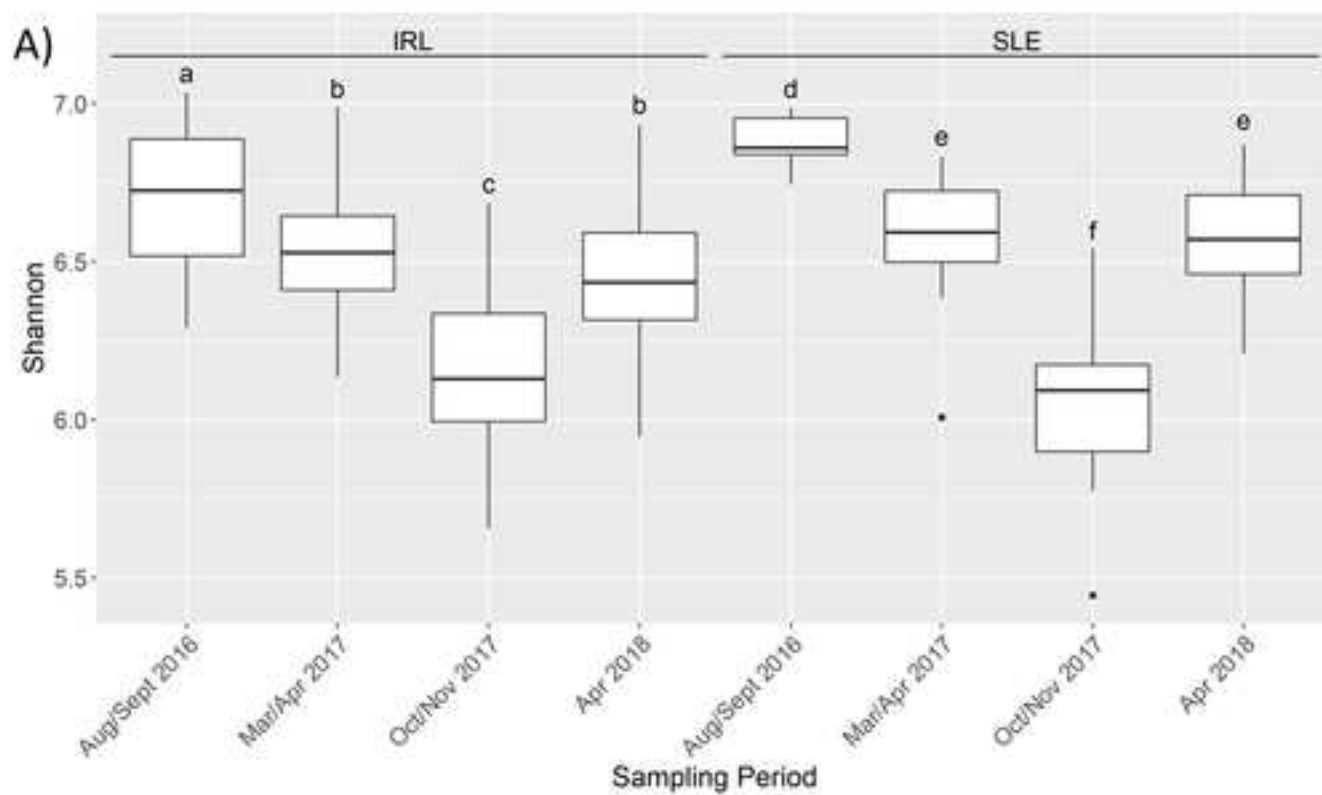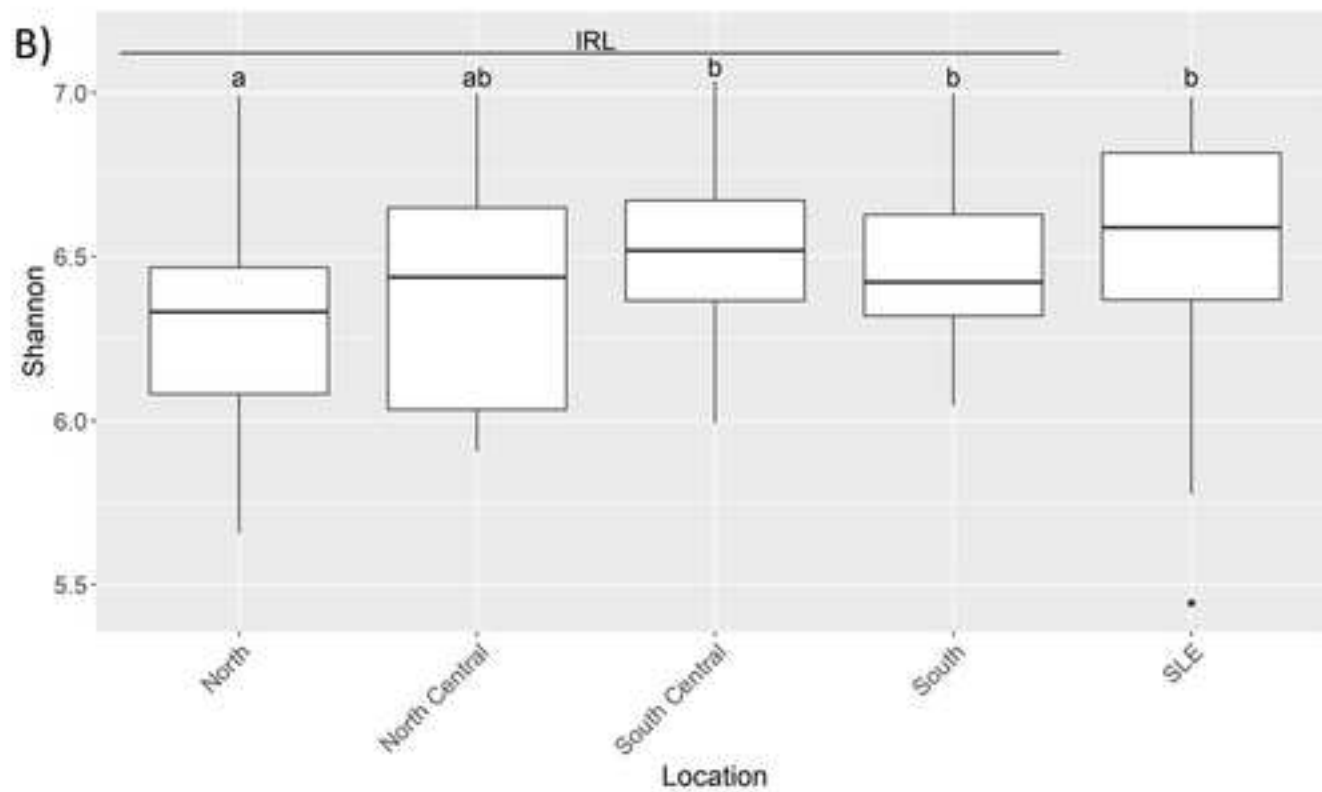

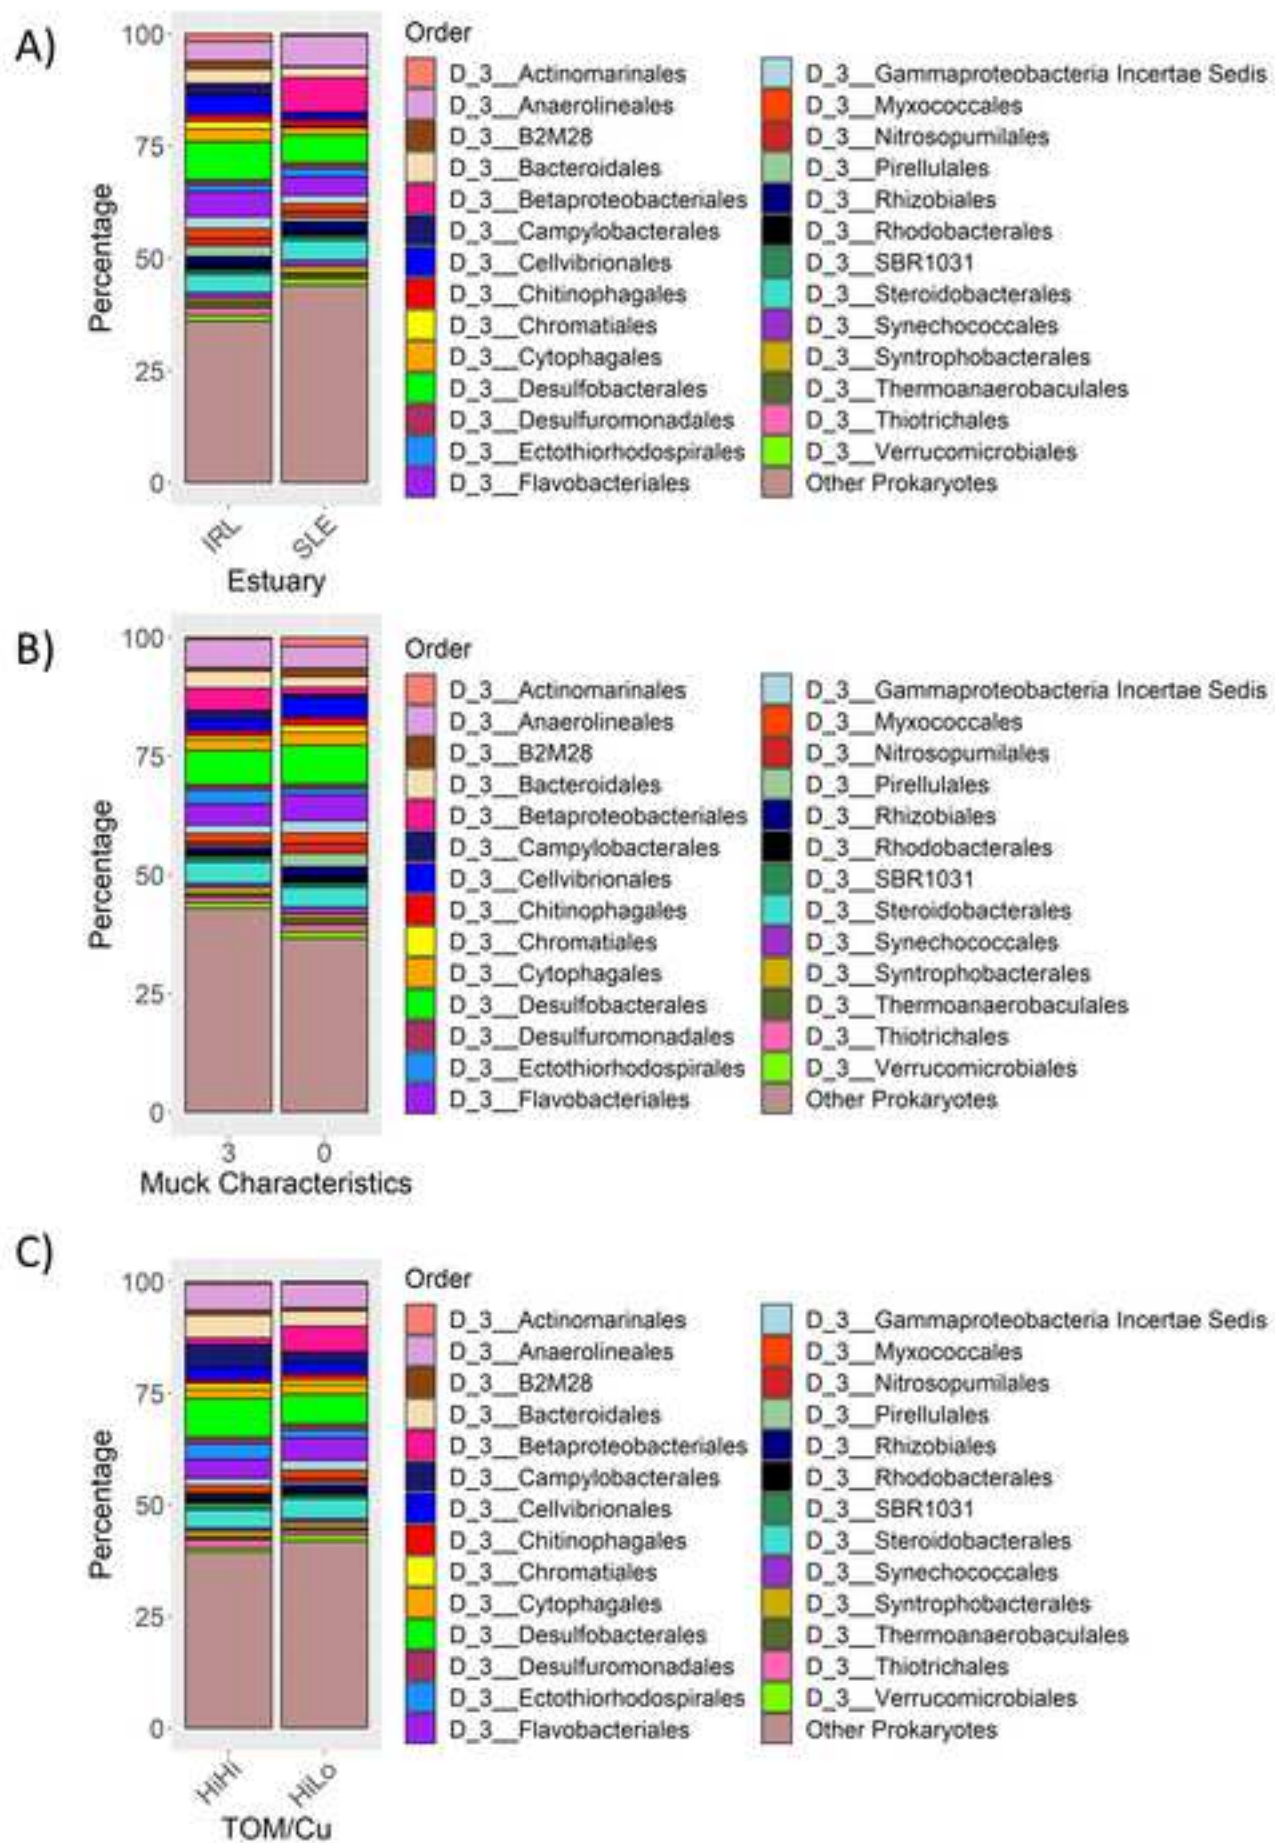

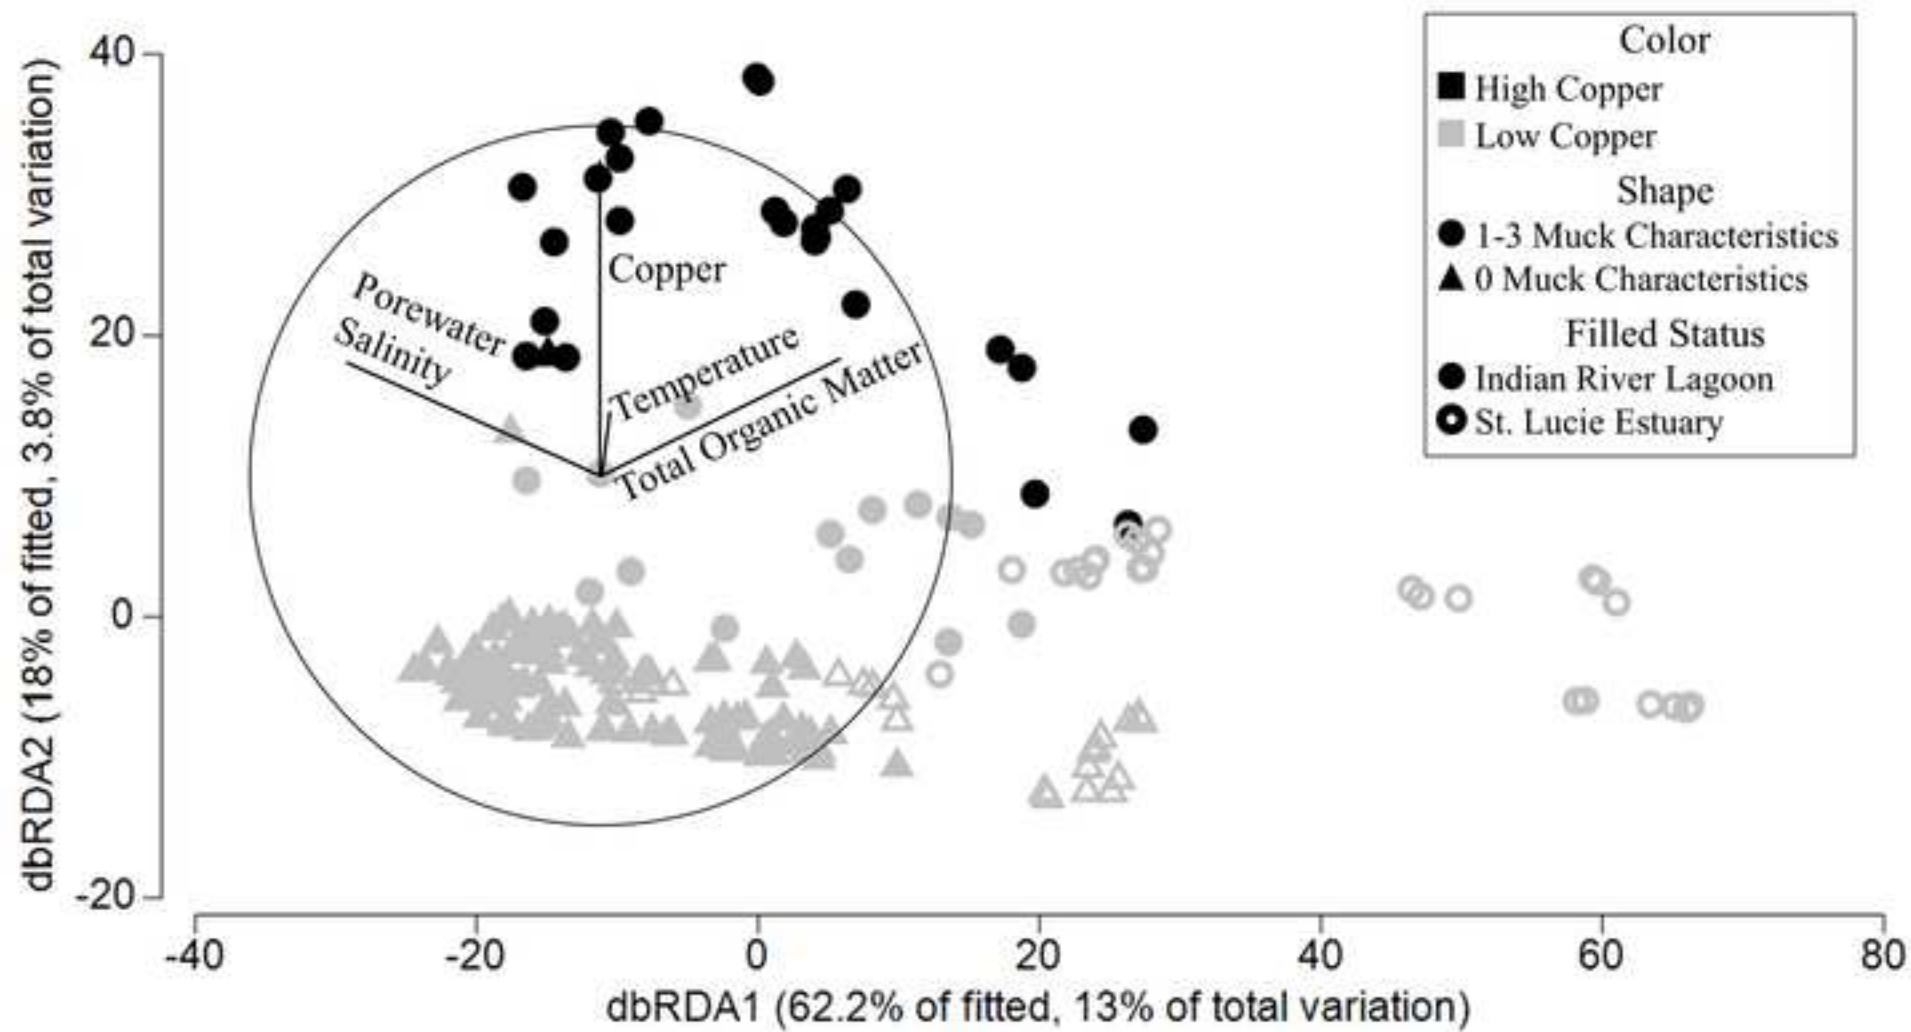

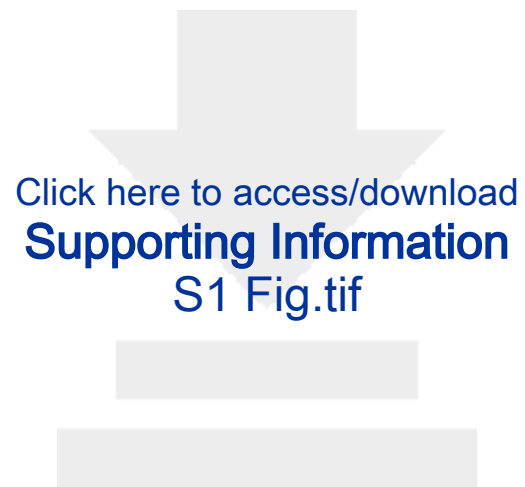

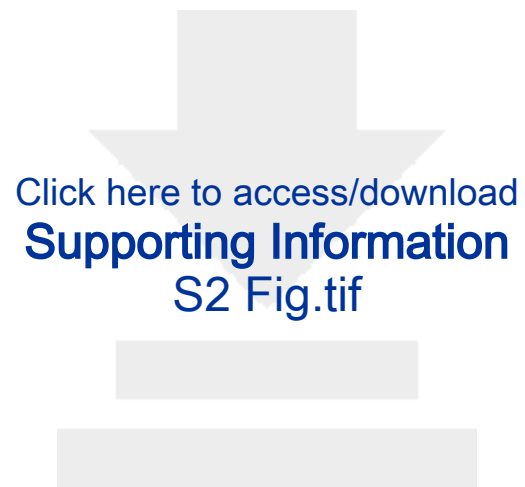

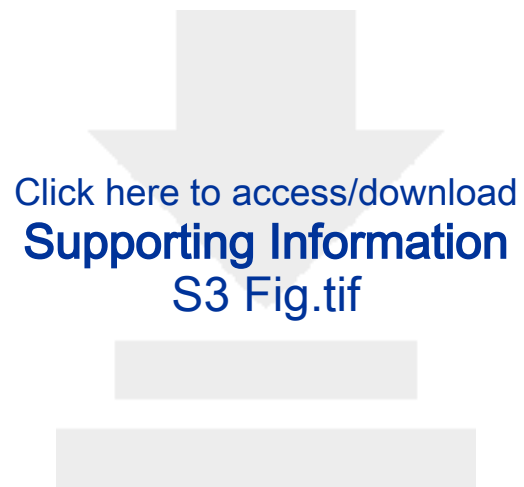

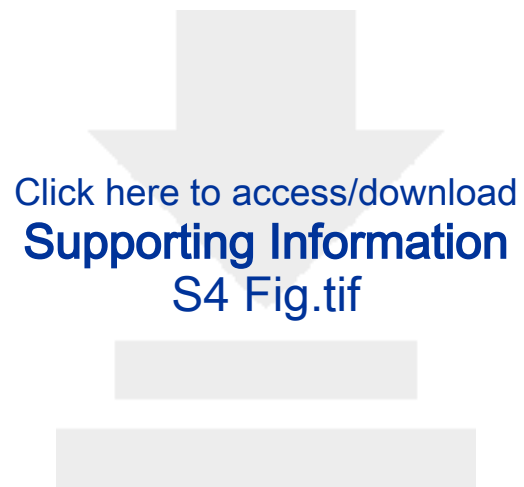

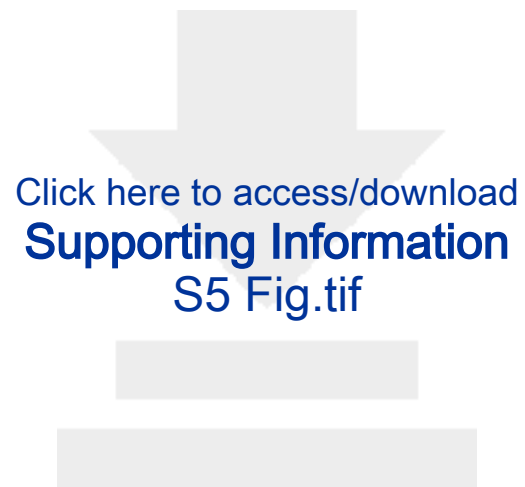



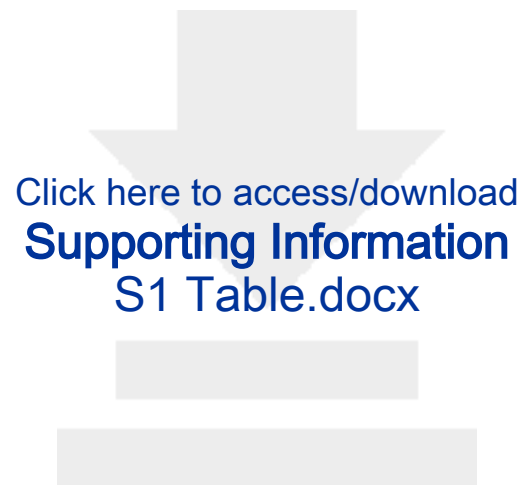

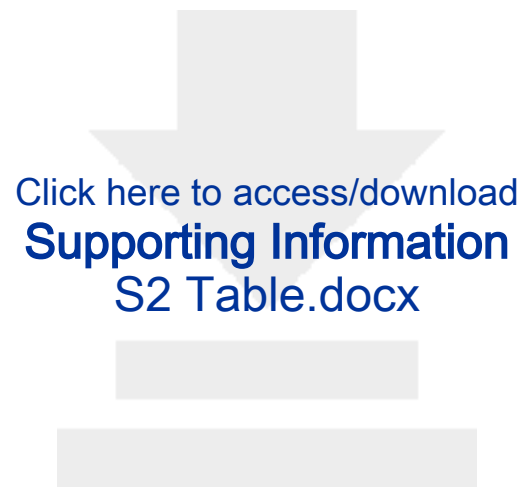

Click here to access/download  
**Supporting Information**  
S2 Table.docx



Click here to access/download  
**Supporting Information**  
S3 Table.docx





Click here to access/download  
**Supporting Information**  
S4 Table.docx



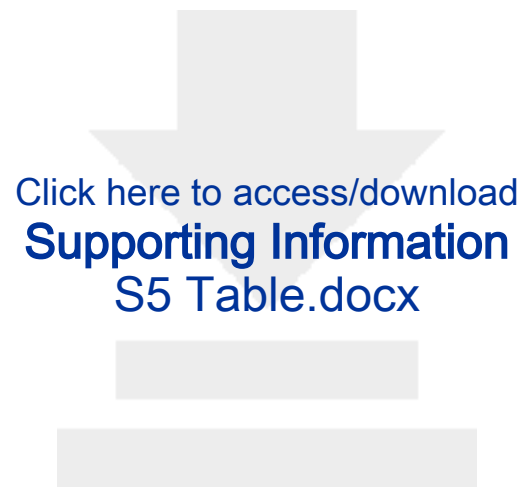

Click here to access/download  
**Supporting Information**  
S5 Table.docx



Click here to access/download  
**Supporting Information**  
S6 Table.docx





Click here to access/download  
**Supporting Information**  
S7 Table.docx



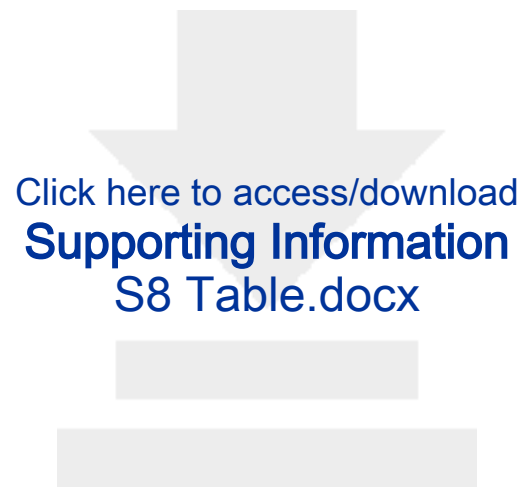

Click here to access/download  
**Supporting Information**  
S8 Table.docx

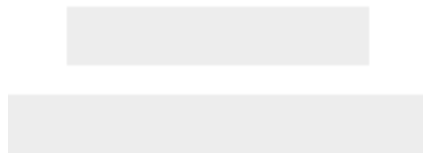

Supplement: pone.0236305.s014.pdf [file pone.0236305.s014.pdf]
